# Supplementary material for: Clinical Risk Score to Predict Pathogenic Genotypes in Patients With Dilated Cardiomyopathy
Source: PubMed Central journal article supplement — J Am Coll Cardiol. Author manuscript; Available in PMC 2024 Jan 23. (PMC10804447; doi:10.1016/j.jacc.2022.06.040), 2022-09-20
Supplement: NIHMS1959626-supplement-Supplementary_Material.pdf [file NIHMS1959626-supplement-Supplementary_Material.pdf]

## Supplemental Material

Escobar-Lopez et al.

### Clinical Risk Score to Predict Pathogenic Genotypes in Patients with Dilated Cardiomyopathy

**Online Supplementary Methods:** Variant classification and rules applied for categorization.

**Online Table 1:** Distribution of the disease-causing affected genes in patients with a positive genetic test result in the derivation cohort ( $n = 377$ ).

**Online Table 2:** Distribution of affected genes in probands with concomitant skeletal myopathy in the derivation cohort ( $n = 36$ ).

**Online Table 3:** Internal validation: Final model adjusted by bootstrap shrinkage.

**Online Table 4:** Distribution of the disease-causing affected genes in patients with a positive genetic test result in the validation cohort ( $n = 289$ ).

**Online Table 5:** Distribution of affected genes in probands with concomitant skeletal myopathy in the validation cohort ( $n = 15$ ).

**Online Table 6:** Predicted probability for all-sets

**Online Figure 1:** External validation.

**Online Figure 2:** Results of genetic testing in the derivation cohort according to the Madrid Genotype Score thresholds.

**Candidate variables and definitions.**

**Additional collaborators at participating centers.**

**List of pathogenic and likely pathogenic variables identified in the derivation cohort**

**List of pathogenic and likely pathogenic variables identified in the validation cohort**

### **Online supplementary methods. Variant classification and rules applied for categorization.**

Rare genetic variants detected in probands were centrally assessed for pathogenicity and subsequently classified as pathogenic, likely pathogenic, variant of uncertain significance, likely benign or benign by expert assessment using modified criteria of the American College of Medical Genetics and Genomics and the Association for Molecular Pathology (ACMG/AMP) guidelines, following the recommendations of the ClinGen Guidelines for Variant Interpretation in Dilated Cardiomyopathy (Morales A. et al. Variant interpretation for dilated cardiomyopathy. *Circulation: Genomic and Precision Medicine*, 43–51.).

The following ACMG/AMP modified rules were applied:

#### ***Population frequency:***

**PM2:** Applied if the filtering allele frequency in the Genomes Aggregation Database (gnomAD) exomes dataset (version 2.1) was below 0.004%, and if the variant was absent from a cohort of disease controls of Spanish origin (Health in Code database).

**BS1:** Applied if the filtering allele frequency in the gnomAD exomes dataset (version 2.1) was  $\geq 0.05\%$ .

**BA1:** Applied if the filtering allele frequency in the gnomAD exomes dataset (version 2.1) was  $> 0.1\%$ .

#### ***General rules:***

**PVS1:** Truncating variants, i.e., frameshift, nonsense, splice donor and splice acceptor variants, initiation codon, single or multi-exon deletion in the following genes in which LOF is a proven mechanism of disease: *DSP*, *PKP2*, *LMNA*, *MYBPC3*, *FHL1*, *DMD*.

**PVS1\_Strong:** Truncating variants, i.e., frameshift, nonsense, splice donor and splice acceptor variants, initiation codon, single or multi-exon deletion in the following genes in which LOF is a proven mechanism of disease: *DSG2*, *DSC2*, *FLNC*, *TNNT2*, *PLN*, *TBX20*, *NKX2-5*, *PRDM16*. In *TTN*, the rule only applied if the variant affected the A band and/or constitutive exons in the adult cardiac N2B isoform (more than 95% of exon usage -transcript incorporation- in human adult left ventricle).

**PM4/BP3:** A protein length change because of an in-frame deletion or insertion in a non-repeat region or within a region annotated by repeat masker.

**PS1:** Same amino acid change as a previously established pathogenic variant (multiple ClinVar submissions with no conflicting evidence).

**PM5:** Novel missense change at an amino acid residue where a different missense change has previously been established as pathogenic (multiple ClinVar submissions with no conflicting evidence).

**PM1:** Located in a mutational hot spot and/or critical and well-established functional domain (e.g., active site of an enzyme) without benign variation. This rule applied only for non-truncating rare variants (PM2 rule activated) present in genes that had regions/domains in which all missense variants in these domains identified to date have been shown to be pathogenic and specifically associated with DCM. The rules applied only for RBM20 (amino acid 630-640 and 910-920), and TNNT2 (residues 131-179). We considered that in the remaining genes the information in relation to DCM was insufficient to apply this rule, and that the information based on other phenotypes (i.e., HCM) should not be extrapolated.

***Case-control analysis and probands with a consistent phenotype (only one of the following rules can be activated):***

**PS4:** Two scenarios are contemplated:

- A. Variants enriched in case cohorts compared with population controls. The DCM cohort used was the Health in Code, A Coruña, Spain, comprising up to 6179 probands (enrichment was defined as a Fisher's exact test  $P < 1.79 \times 10^{-6}$ , after multiple testing correction). PS4 was also applied for any additional variants enriched in the DCM cohort described in this study (present in  $\geq 3$  cases and  $P < 1.9 \times 10^{-4}$  after Bonferroni multiple testing correction).
- B.  $\geq 15$  probands with a consistent confirmed phenotype (DCM). Applies only for very rare variants (PM2 criteria met).

**PS4\_Moderate:** Variant identified in  $\geq 6$  probands with consistent confirmed phenotypes (DCM). Only applicable if the variant is absent or rare in large population studies (PM2 criteria met).

**PS4\_Supporting:** Variant identified in  $\geq 2$  probands with consistent confirmed phenotypes (DCM). Only applicable if the variant is absent or rare in large population studies (PM2 criteria met).

***Cosegregation rules (only one of the following rules can be activated):***

**PP1\_Strong:** Cosegregation with disease in  $\geq 7$  segregations in affected family members in a gene definitively known to cause the disease (present in ClinGen curation for DCM). Only applicable if the variant is also absent or rare in large population studies (PM2 criteria met).

**PP1\_Moderate:** Cosegregation with disease in  $\geq 5$  segregations in affected family members in a gene definitively known to cause the disease (present in ClinGen curation for DCM). Only applicable if the variant is also absent or rare in large population studies (PM2 criteria met).

**PP1:** Cosegregation with disease in  $\geq 3$  segregations in affected family members in a gene definitively known to cause the disease (present in ClinGen curation for DCM). Only applicable if the variant is also absent or rare in large population studies (PM2 criteria met).

***De novo rules:***

**PS2:** *De novo* (paternity confirmed) in a patient with the disease and no family history (FH) (no suspicion of cardiomyopathy through three generations, and parents have been thoroughly clinically evaluated without evidence suggestive of cardiomyopathy). Only applicable in the ABSENCE of any other possible disease-causing variants.

**PM6:** Confirmed *de novo*, but without confirmation of paternity or maternity. Both parents must have been tested and shown not to carry the variant, but clinical evaluation of parents is not required.

***Functional studies and predictors:***

**PS3:** Well-established *in vitro* or *in vivo* functional studies supportive of a damaging effect on the gene or gene product. Mammalian variant-specific knock-in models or cell model (or other *in vitro* assay) that produces a cellular phenotype that reliably predicts clinical DCM, or causality is demonstrated with appropriate controls (e.g., correction of the variant reverses the phenotype).

**PP3/BP4:** Multiple lines of computation evidence support or refute a deleterious effect.

For missense variants, CADD, DANN, FATHMM, Polyphen-2, and MutationTaster were used. The rule applied if 4/5 predictors yielded the same result on the impact on the protein.

For intronic variants out of the splicing consensus site (+1, +2, -1, -2) the following predictors were used: SSF, MaxEnt, NNSplice, GeneSplicer and AdaBoost. The rule applied if 4/5 predictors yielded the same result on the impact on splicing.

**Online Table 1. Distribution of the disease-causing affected genes in patients with a positive genetic test result in the derivation cohort (n = 377)**

| <b>Affected Gene</b> | <b>Frequency</b> | <b>Percent</b> |
|----------------------|------------------|----------------|
| <i>TTN</i>           | 143              | 37.93          |
| <i>LMNA</i>          | 33               | 8.75           |
| <i>DSP</i>           | 32               | 8.49           |
| <i>BAG3</i>          | 24               | 6.37           |
| <i>RBM20</i>         | 22               | 5.84           |
| <i>FLNC</i>          | 21               | 5.57           |
| <i>DMD</i>           | 19               | 5.04           |
| <i>MYH7</i>          | 19               | 5.04           |
| <i>MYBPC3</i>        | 18               | 4.77           |
| <i>TNNT2</i>         | 13               | 3.45           |
| <i>PKP2</i>          | 6                | 1.59           |
| <i>TPM1</i>          | 5                | 1.33           |
| <i>TNNI3</i>         | 4                | 1.06           |
| <i>DSG2</i>          | 3                | 0.80           |
| <i>TBX20</i>         | 3                | 0.80           |
| <i>ACTC1</i>         | 2                | 0.53           |
| <i>PLN</i>           | 2                | 0.53           |
| <i>DSC2</i>          | 1                | 0.27           |
| <i>EMD</i>           | 1                | 0.27           |
| <i>FKRP</i>          | 1                | 0.27           |
| <i>JPH2</i>          | 1                | 0.27           |
| <i>PRDM16</i>        | 1                | 0.27           |
| <i>SGCD</i>          | 1                | 0.27           |
| <i>TMEM43</i>        | 1                | 0.27           |
| <i>TNNC1</i>         | 1                | 0.27           |
| <b>Total</b>         | <b>377</b>       | <b>100.00</b>  |

Online Table 2. Distribution of affected genes in probands with concomitant skeletal myopathy in the derivation cohort (*n* = 36)

| Affected gene     | Frequency | Percent        |
|-------------------|-----------|----------------|
| <i>BAG3</i>       | 1         | 2.8%           |
| <i>DMD</i>        | 7         | 19.4%          |
| <i>FKRP</i>       | 1         | 2.8%           |
| <i>LMNA</i>       | 7         | 19.4%          |
| <i>MYBPC3</i>     | 3         | 8.3%           |
| <i>MYH7</i>       | 2         | 5.6%           |
| <i>TTN</i>        | 1         | 2.8%           |
| <i>PRDM16</i>     | 1         | 2.8%           |
| Genotype-negative | 13        | 36.1%          |
| <b>Total</b>      | <b>36</b> | <b>100.00%</b> |

**Online Table 3. Internal validation: Final model adjusted by bootstrap shrinkage**

|                            | <b>Odds Ratio (95% CI)</b> | <b>P-value</b> |
|----------------------------|----------------------------|----------------|
| FH of DCM                  | 2.18 (1.67-2.84)           | <0.001         |
| Skeletal muscle disease    | 3.17 (1.56-6.46)           | 0.001          |
| LBBB (absence of)          | 3.31 (2.42-4.53)           | <0.001         |
| Low QRS voltage limb leads | 3.34 (2.25-4.94)           | <0.001         |
| Hypertension (absence of)  | 2.17 (1.62-2.91)           | <0.001         |
| _cons (baseline odds)      | 0.08 (0.07-0.09)           | <0.001         |

**Online Table 4. Distribution of the disease-causing affected genes in patients with a positive genetic test result in the validation cohort (n = 289)**

| <b>Affected Gene</b> | <b>Frequency</b> | <b>Percent</b> |
|----------------------|------------------|----------------|
| <i>TTN</i>           | 143              | 49.00          |
| <i>FLNC</i>          | 26               | 8.90           |
| <i>LMNA</i>          | 25               | 8.56           |
| <i>TNNT2</i>         | 24               | 8.22           |
| <i>MYH7</i>          | 14               | 4.79           |
| <i>DSP</i>           | 11               | 3.77           |
| <i>RBM20</i>         | 7                | 2.40           |
| <i>DMD</i>           | 5                | 1.71           |
| <i>SCN5A</i>         | 5                | 1.71           |
| <i>BAG3</i>          | 4                | 1.37           |
| <i>DSC2</i>          | 4                | 1.37           |
| <i>TPM1</i>          | 4                | 1.37           |
| <i>DSG2</i>          | 3                | 1.03           |
| <i>MYBPC3</i>        | 3                | 1.03           |
| <i>ACTC1</i>         | 2                | 0.68           |
| <i>DES</i>           | 2                | 0.68           |
| <i>PKP2</i>          | 2                | 0.68           |
| <i>PLN</i>           | 2                | 0.68           |
| <i>EMD</i>           | 1                | 0.34           |
| <i>PRDM16</i>        | 1                | 0.34           |
| <i>TNNC1</i>         | 1                | 0.34           |
| Total                | 289              | 100.00         |



Online Table 5. Distribution of affected genes in probands with concomitant skeletal myopathy in the validation cohort ( $n = 15$ )

| Affected gene     | Frequency | Percent        |
|-------------------|-----------|----------------|
| <i>DMD</i>        | 3         | 20.0%          |
| <i>EMD</i>        | 1         | 6.7%           |
| <i>FLNC</i>       | 1         | 6.7%           |
| <i>LMNA</i>       | 2         | 13.3%          |
| <i>MYH7</i>       | 1         | 6.7%           |
| <i>TTN</i>        | 2         | 13.3%          |
| Genotype-negative | 5         | 33.3%          |
| <b>Total</b>      | <b>15</b> | <b>100.00%</b> |

Online Table 6. Predicted probability for all-sets

| Family history of DCM | Skeletal myopathy | Absence of LBBB | Low QRS voltage on limb leads | Absence of hypertension | Predicted probability |
|-----------------------|-------------------|-----------------|-------------------------------|-------------------------|-----------------------|
| No                    | No                | No              | No                            | No                      | 0.0657                |
| No                    | No                | No              | No                            | Yes                     | 0.1385                |
| Yes                   | No                | No              | No                            | No                      | 0.1389                |
| No                    | No                | Yes             | No                            | No                      | 0.2013                |
| No                    | No                | No              | Yes                           | No                      | 0.2027                |
| Yes                   | No                | No              | No                            | Yes                     | 0.2693                |
| No                    | Yes               | No              | No                            | Yes                     | 0.3550                |
| Yes                   | Yes               | No              | No                            | No                      | 0.3559                |
| No                    | No                | Yes             | No                            | Yes                     | 0.3655                |
| Yes                   | No                | Yes             | No                            | No                      | 0.3664                |
| No                    | No                | No              | Yes                           | Yes                     | 0.3674                |
| Yes                   | No                | No              | Yes                           | No                      | 0.3683                |
| No                    | Yes               | Yes             | No                            | No                      | 0.4633                |
| No                    | No                | Yes             | Yes                           | No                      | 0.4767                |
| Yes                   | Yes               | No              | No                            | Yes                     | 0.5580                |
| Yes                   | No                | Yes             | No                            | Yes                     | 0.5692                |
| Yes                   | No                | No              | Yes                           | Yes                     | 0.5712                |
| No                    | Yes               | Yes             | No                            | Yes                     | 0.6636                |
| Yes                   | Yes               | Yes             | No                            | No                      | 0.6644                |
| No                    | No                | Yes             | Yes                           | Yes                     | 0.6755                |
| Yes                   | No                | Yes             | Yes                           | No                      | 0.6763                |
| Yes                   | Yes               | Yes             | No                            | Yes                     | 0.8190                |
| Yes                   | No                | Yes             | Yes                           | Yes                     | 0.8268                |
| No                    | Yes               | Yes             | Yes                           | Yes                     | 0.8770                |
| Yes                   | Yes               | Yes             | Yes                           | Yes                     | 0.9424                |

Online Figure 1. External validation. C-Statistic = 0.743, 95%CI 0.711-0.775

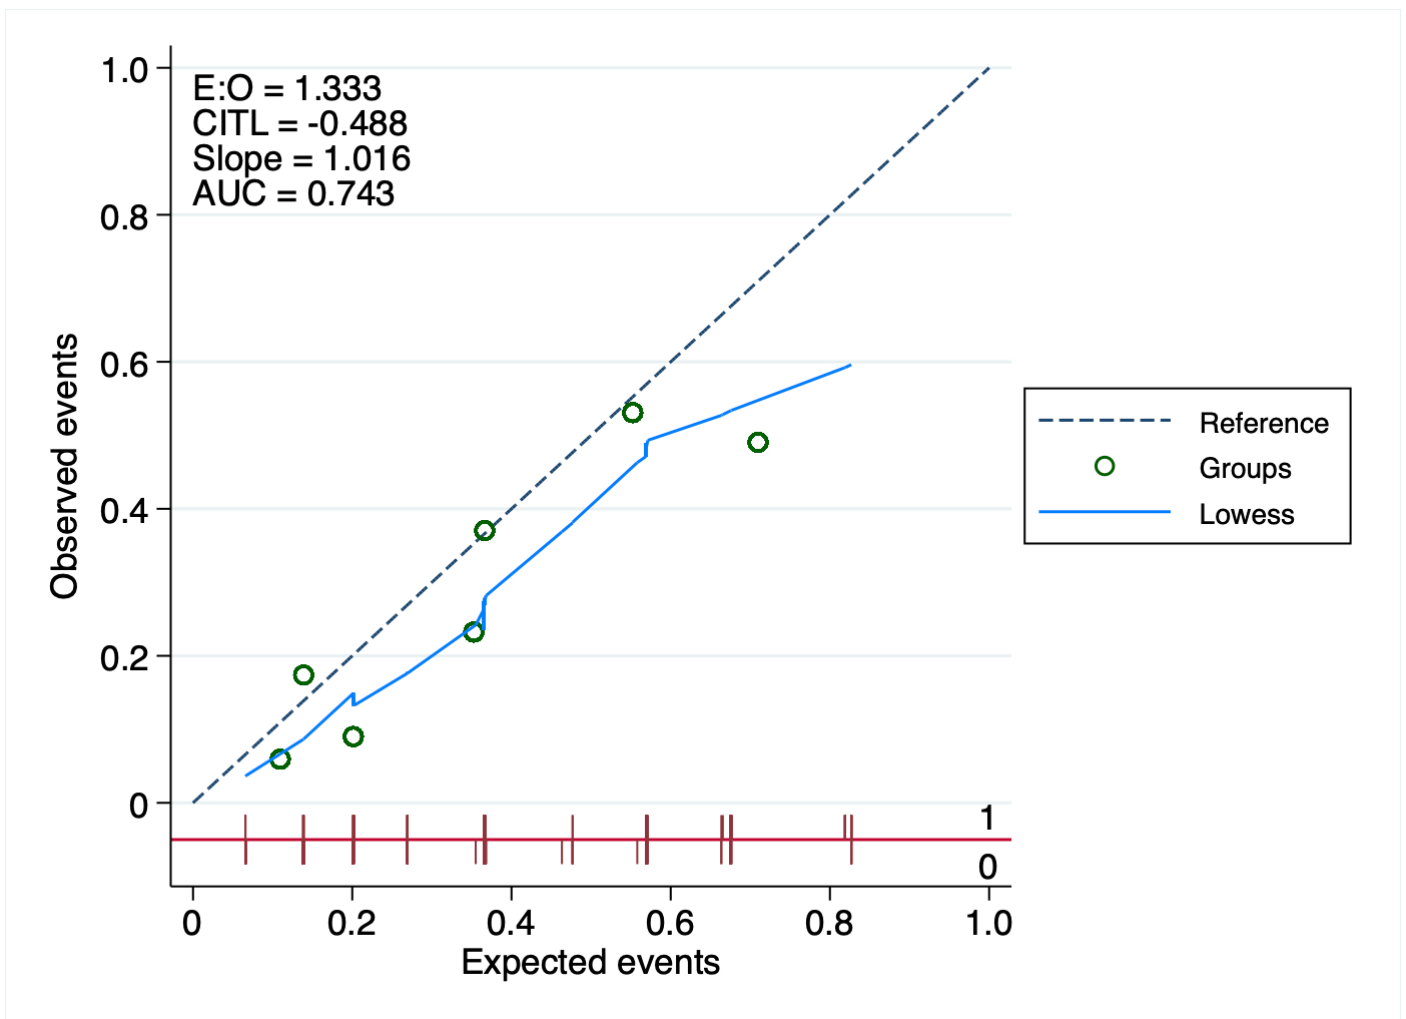

**Online Figure 2. Results of genetic testing in the derivation cohort according to the Madrid DCM genotype score thresholds**

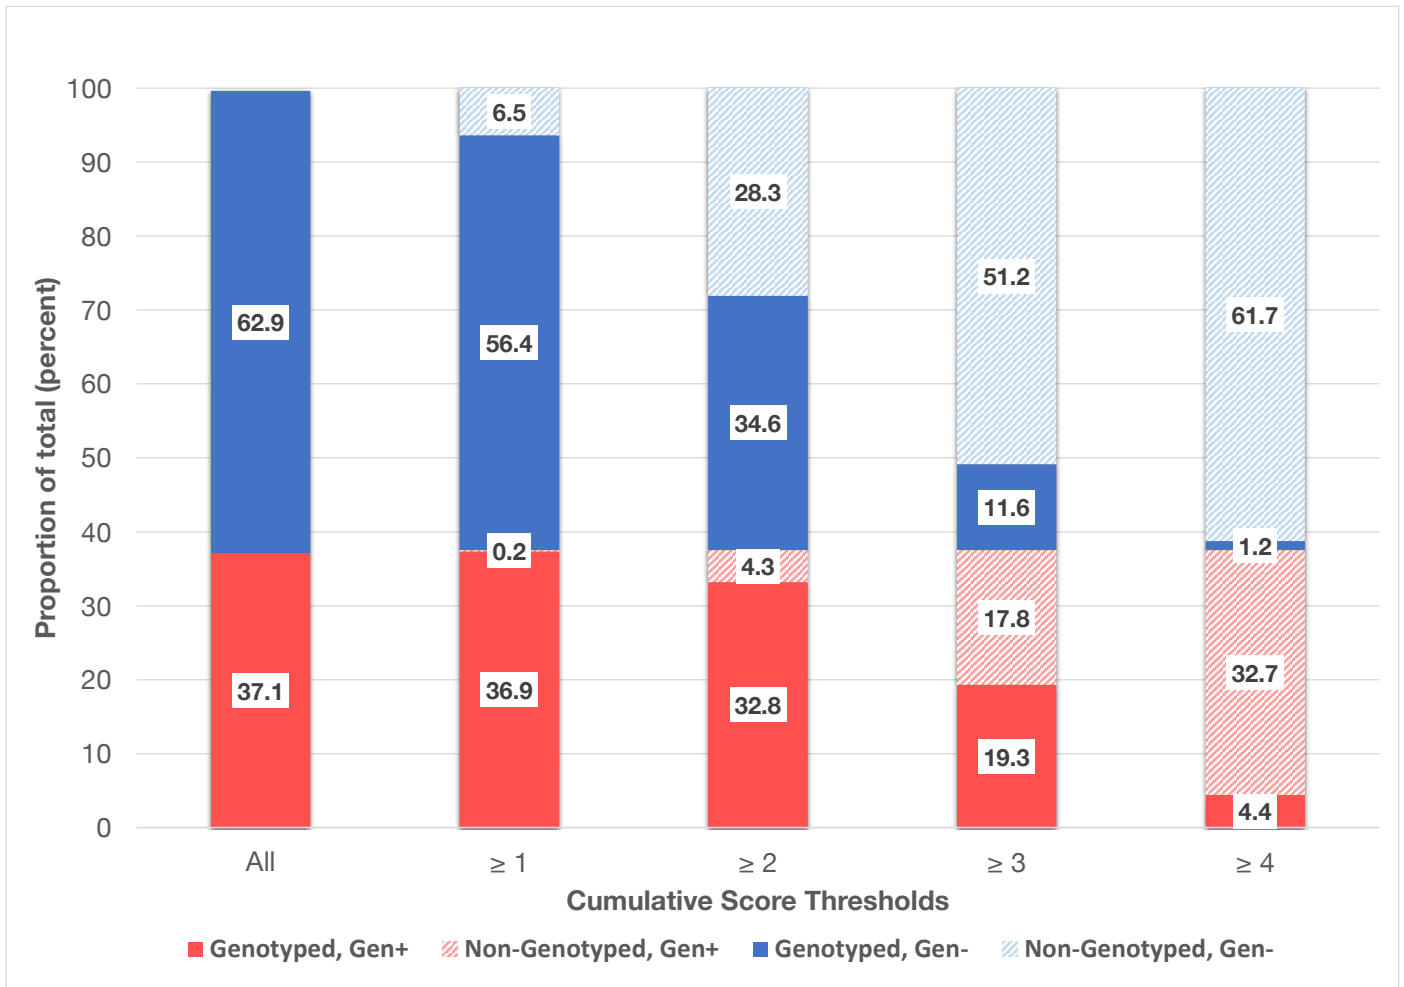

The bars show the impact of using different score thresholds to select patients for genotyping. Each bar represents the complete derivation cohort ( $n = 1015$ ) and color-coding represents the proportion of patients classified as genotype-positive (red) and genotype-negative (blue) as well as individuals who would have been genotyped (solid color) or not genotyped (striped color) according to each threshold.

### Candidate variables and definitions:

1. Sex.
2. Age at diagnosis.
3. Hypertension: Hypertension preceding DCM diagnosis or diagnosed at the first evaluation. In accordance with most major guidelines, hypertension is diagnosed when a person's systolic blood pressure in the office or clinic is  $\geq 140$  mm Hg and/or their diastolic blood pressure is  $\geq 90$  mm Hg following repeated examination. (Reference: European Heart Journal: doi/10.1093/eurheartj/ehy339, Hypertension: doi.org/10.1161/HYPERTENSIONAHA.120.15026).
4. Diabetes: Diabetes preceding DCM diagnosis or diagnosed at the first evaluation according to the diagnosis criteria of the guidelines of the American Diabetes Association: doi.org/10.2337/dc19-S002, Diabetes Care 2019 Jan; 42(Supplement 1): S13-S28.
5. Smoking history: Current or former smoker according to World Health Organization (WHO) definition.
6. Hypercholesterolemia: According to WHO definition.
7. Skeletal muscle disease: Clinically diagnosed myopathy by a neurologist based on physical examination findings, electromyography, or histopathological alterations at initial cardiac evaluation.
8. FH of DCM: family history of non-ischemic DCM (excluding severe valvular heart disease) in any first-, second-, or third-degree relative.
9. FH of sudden cardiac death (SCD) in a first-degree relative: History of SCD in a first-degree relative <50 years of age with SCD deemed definitely or likely due to DCM.
10. FH of SCD in a non-first-degree relative: History of SCD in a non-first-degree relative <50 years of age with SCD deemed definitely or likely due to DCM.
11. FH of skeletal myopathy: History of clinically diagnosed skeletal myopathy in a first-degree or close relative <50 years of age.
12. LBBB: QRS duration  $> 0.12$  sec with a LBBB pattern on the baseline ECG.
13. AV block (any degree) at baseline: Observed on the baseline ECG.
14. Atrial fibrillation: History of atrial fibrillation at initial evaluation.
15. Abnormal T-wave inversion: Negative T-wave of  $\geq 1$  mm in depth in two or more contiguous leads with exclusion of leads aVR, III and V1 on the baseline ECG.
16. Low QRS voltage limb leads: QRS amplitude  $\leq 5$  mm (0.5 mV) in all limb leads on the baseline ECG.
17. Low QRS voltage precordial leads: QRS amplitude  $\leq 10$  mm (10 mV) in all precordial leads on the baseline ECG.
18. Baseline LVEF: Left ventricular ejection fraction measured by 2-dimensional echocardiography at the baseline assessment.

**Additional collaborators at participating centers:**

Complejo Hospitalario Universitario de Santiago de Compostela, Spain: María Alvarez-Barredo, María Brion.

Hospital Universitario 12 de Octubre, Instituto de Investigación i+12. Madrid. Spain: Rafael Salguero-Bodes.

Hospital Clínico Universitario Valladolid, Valladolid, Spain: Pablo Elpidio García-Granja.

Complejo Hospitalario Universitario de Cáceres, Cáceres, Spain: Zineb Kounka, Luis Enrique Lezcano Gort.

Complejo Hospitalario Universitario de A Coruña, Servizo Galego de Saúde (SERGAS), Universidade da Coruña, A Coruña, Spain: Roberto Barriales-Villa, María Generosa Crespo Leiro, María Jesús Paniagua Martín, Eduardo Barge Caballero, Zulaica María Grille Cancela, David Couto Mallón, Gonzalo Barge Caballero, Patricia Pardo Martinez, Marta Sagastagoitia Forie.

Department of Cardiology, Área del Corazón, Hospital Universitario de Navarra, Pamplona, Spain: Gemma Lacuey Lecumberri, Nerea Mora Ayestarán, Ana Abecia Ozcáriz, Lucía Lorenzo Domínguez.

Hospital Universitari Vall d'Hebron, Vall d'Hebron Institut de Recerca (VHIR). Universitat Autònoma de Barcelona. Barcelona. Spain: Javier Limeres, Guillem Casas.

Hospital General Universitario de Alicante. Instituto de Investigación Sanitaria y Biomédica de Alicante (ISABIAL), Alicante, Spain: Maria García Álvarez.

Hospital Universitario Virgen de las Nieves, Granada: Juan Jimenez-Jaimez, Rosa Macias.

Hospital Universitario Virgen de la Arrixaca, Murcia: Marina Navarro Peñalver, Juan Ramon Gimeno-Blanes.

Hospital Universitario Virgen de la Victoria, IBIMA, Malaga, Spain: Ainhoa Robles-Mezcua, Alejandro I. Pérez-Cabeza, Clara Jiménez-Rubio, Arancha Díaz-Expósito

Hospital General Universitario Gregorio Marañón, Madrid, Spain: Cristina Gomez González, Irene Mendez, Javier Bermejo Thomas, Ana Isabel Fernández, Silvia Vilches Soria.

Hospital Universitario Son Llatzer. Palma de Mallorca, Spain: Jorge Alvarez-Rubio, David Cremer-Luengos, Guido Antoniutti, Fiama Caimi-Martinez.

Hospital Universitario Puerta de Hierro Majadahonda, Madrid, Spain: Eva Cabrera, Marta Cobo-Marcos, Esther Gonzalez-Lopez, Fernando de Frutos, Javier Segovia.

List of pathogenic and likely pathogenic variables identified in the derivation cohort

| Gene  | Transcript  | Protein change    | Variant type | Number of probands (this cohort) | HIC controls (FAF) n alleles = 10,508 | gnomAD FAF popmax | ACMG rules                          | ACMG classification |
|-------|-------------|-------------------|--------------|----------------------------------|---------------------------------------|-------------------|-------------------------------------|---------------------|
| ACTC1 | NM_005159.4 | p.Asp4His         | Missense     | 1                                | 0                                     | 0                 | PM2,PP2,PP3,PP4,PS4_Supporting,     | LP                  |
| ACTC1 | NM_005159.4 | p.Met271Val       | Missense     | 1                                | 0                                     | 0                 | PM2,PP2,PP3,PP4,PS4_Supporting,     | LP                  |
| BAG3  | NM_004281.3 | p.Ala128Glufs*84  | Frame-shift  | 1                                | 0                                     | 0                 | PVS1,PM2,PS4_Moderate,PP1,          | P                   |
| BAG3  | NM_004281.3 | p.Ala176Hisfs*31  | Frame-shift  | 1                                | 0                                     | 0                 | PVS1,PM2,                           | LP                  |
| BAG3  | NM_004281.3 | p.Arg121*         | Nonsense     | 1                                | 0                                     | 0                 | PVS1,PM2,PS4_Moderate,              | P                   |
| BAG3  | NM_004281.3 | p.Arg301Serfs*6   | Frame-shift  | 2                                | 0                                     | 0                 | PVS1,PM2,PP1,PP5,                   | P                   |
| BAG3  | NM_004281.3 | p.Arg309*         | Nonsense     | 3                                | 0                                     | 0                 | PVS1,PM2,PS4_Moderate,PP1,PP5,      | P                   |
| BAG3  | NM_004281.3 | p.Gln116*         | Nonsense     | 1                                | 0                                     | 0                 | PVS1,PM2,                           | LP                  |
| BAG3  | NM_004281.3 | p.Gln132*         | Nonsense     | 1                                | 0                                     | 0                 | PVS1,PM2,                           | LP                  |
| BAG3  | NM_004281.3 | p.Gln153*         | Nonsense     | 1*                               | 0                                     | 0                 | PVS1,PM2,PP1,                       | P                   |
| BAG3  | NM_004281.3 | p.Gln88*          | Nonsense     | 1                                | 0                                     | 0                 | PVS1,PM2,PP5,                       | P                   |
| BAG3  | NM_004281.3 | p.Glu471Lys       | Missense     | 2                                | 0                                     | 0,000016          | PM1,PM2,PP3,PP5,                    | LP                  |
| BAG3  | NM_004281.3 | p.Glu543Lysfs*23  | Frame-shift  | 2                                | 0                                     | 0                 | PVS1,PM2,                           | LP                  |
| BAG3  | NM_004281.3 | p.His232Thrfs*75  | Frame-shift  | 1                                | 0                                     | 0                 | PVS1,PM2,                           | LP                  |
| BAG3  | NM_004281.3 | p.His243Thrfs*64  | Frame-shift  | 3                                | 0                                     | 0                 | PVS1,PP1_Strong,PM2,PS4_Supporting, | P                   |
| BAG3  | NM_004281.3 | p.Pro137Glyfs*72  | Frame-shift  | 3                                | 0                                     | 0                 | PVS1,PM2,PS4_Supporting,            | P                   |
| BAG3  | NM_004281.3 | p.Pro402Leufs*22  | Frame-shift  | 1                                | 0                                     | 0                 | PVS1,PM2,                           | LP                  |
| BAG3  | NM_004281.3 | p.Trp36*          | Nonsense     | 1                                | 0                                     | 0                 | PVS1,PM2,PP5,PS4_Supporting,        | P                   |
| DMD   | NM_004006.2 | c.264+2_264+3insT | Splicing     | 1                                | 0                                     | 0                 | PVS1,PM2,PP4,                       | P                   |
| DMD   | NM_004006.2 | c.4072-1G>A       | Splicing     | 1                                | 0                                     | 0                 | PVS1,PM2,PS4_Supporting,            | P                   |
| DMD   | NM_004006.2 | Del exon 10 to 12 | Deletion     | 1                                | 0                                     | 0                 | PVS1,PM2,PS4_Supporting,            | P                   |
| DMD   | NM_004006.2 | Del exon 25 to 30 | Deletion     | 1                                | 0                                     | 0                 | PVS1,PM2,PP4,                       | P                   |
| DMD   | NM_004006.2 | Del exon 3 to 9   | Deletion     | 1                                | 0                                     | 0                 | PVS1,PM2,PS4_Supporting,            | P                   |
| DMD   | NM_004006.2 | Del exon 44 to 53 | Deletion     | 1                                | 0                                     | 0                 | PVS1,PM2,PS4_Supporting,            | P                   |
| DMD   | NM_004006.2 | Del exon 45       | Deletion     | 1                                | 0                                     | 0                 | PVS1,PM2,PS4_Supporting,            | P                   |
| DMD   | NM_004006.2 | Del exon 45 to 47 | Deletion     | 2                                | 0                                     | 0                 | PVS1,PM2,PP4,                       | P                   |
| DMD   | NM_004006.2 | Del exon 46 to 47 | Deletion     | 2                                | 0                                     | 0                 | PVS1,PM2,PP4,                       | P                   |
| DMD   | NM_004006.2 | Del exon 46 to 50 | Deletion     | 1                                | 0                                     | 0                 | PVS1,PM2,PS4_Supporting,            | P                   |
| DMD   | NM_004006.2 | Del exon 48 to 50 | Deletion     | 1                                | 0                                     | 0                 | PVS1,PM2,PS4_Supporting,            | P                   |
| DMD   | NM_004006.2 | Del exon 48 to 51 | Deletion     | 3                                | 0                                     | 0                 | PVS1,PM2,PS4_Supporting,            | P                   |
| DMD   | NM_004006.2 | Del exon 8 to 30  | Deletion     | 1                                | 0                                     | 0                 | PVS1,PM2,PP4,                       | P                   |
| DMD   | NM_004006.2 | Dup exon 56 to 59 | Deletion     | 1                                | 0                                     | 0                 | PVS1,PM2,PS4_Supporting,            | P                   |
| DMD   | NM_004006.2 | p.Lys19Argfs*18   | Frame-shift  | 1                                | 0                                     | 0                 | PVS1,PM2,PP4,                       | P                   |

| Gene | Transcript  | Protein change    | Variant type | Number of probands (this cohort) | HIC controls (FAF) n alleles = 10,508 | gnomAD FAF popmax | ACMG rules                                | ACMG classification |
|------|-------------|-------------------|--------------|----------------------------------|---------------------------------------|-------------------|-------------------------------------------|---------------------|
| DSC2 | NM_024422.4 | p.Arg375*         | Nonsense     | 1                                | 0                                     | 0,00003           | PVS1_Strong,PM2,PP5,PS4_Supporting,       | P                   |
| DSG2 | NM_001943.5 | p.Gln1114*        | Nonsense     | 1                                | 0                                     | 0                 | PVS1_Strong,PM2,                          | LP                  |
| DSG2 | NM_001943.4 | p.Glu156Argfs*14  | Frame-shift  | 1 <sup>#</sup>                   | 0                                     | 0,00003           | PVS1_Strong,PM2,PP5,                      | P                   |
| DSG2 | NM_001943.5 | p.Lys141Asnfs*3   | Frame-shift  | 1                                | 0                                     | 0                 | PVS1_Strong,PM2,                          | LP                  |
| DSG2 | NM_001943.5 | p.Pro142Thr       | Missense     | 1                                | 0                                     | 0,00003           | PM2,PP1,PP3,PS4_Supporting,               | LP                  |
| DSP  | NM_004415.3 | c.1045-1G>A       | Splicing     | 1                                | 0                                     | 0                 | PVS1,PM2,                                 | LP                  |
| DSP  | NM_004415.3 | c.1267-2A>G       | Splicing     | 1                                | 0                                     | 0                 | PVS1,PM2,PS4_Supporting,                  | P                   |
| DSP  | NM_004415.3 | c.2130+1G>A       | Splicing     | 1                                | 0                                     | 0                 | PVS1,PM2,                                 | LP                  |
| DSP  | NM_004415.3 | c.2131-1G>T       | Splicing     | 1                                | 0                                     | 0                 | PVS1,PM2,                                 | LP                  |
| DSP  | NM_004415.3 | c.939+1G>A        | Splicing     | 1                                | 0                                     | 0                 | PVS1,PM2,PP1_Moderate,PP5,PS4_Supporting, | P                   |
| DSP  | NM_004415.3 | Del exon 21 a 23  | Deletion     | 2                                | 0                                     | 0                 | PVS1,PM2,PS4_Supporting,                  | P                   |
| DSP  | NM_004415.3 | Del exon 9 a 24   | Deletion     | 1                                | 0                                     | 0                 | PVS1,PM2,                                 | LP                  |
| DSP  | NM_004415.3 | p.Arg1045*        | Nonsense     | 1                                | 0                                     | 0                 | PVS1,PM2,PP5,                             | P                   |
| DSP  | NM_004415.3 | p.Arg1236Thrfs*13 | Missense     | 1                                | 0                                     | 0                 | PVS1,PM2,                                 | LP                  |
| DSP  | NM_004415.3 | p.Arg1951*        | Nonsense     | 1                                | 0                                     | 0                 | PVS1,PM2,PP5,                             | P                   |
| DSP  | NM_004415.3 | p.Arg451His       | Missense     | 4                                | 0                                     | 0                 | PM2,PM5,PP3,PS4_Supporting,               | LP                  |
| DSP  | NM_004415.3 | p.Asp1587Thrfs*15 | Frame-shift  | 1                                | 0                                     | 0                 | PVS1,PM2,                                 | LP                  |
| DSP  | NM_004415.3 | p.Asp2146Metfs*8  | Frame-shift  | 1                                | 0                                     | 0                 | PVS1,PM2,                                 | LP                  |
| DSP  | NM_004415.3 | p.Asp2521Glufs*39 | Frame-shift  | 1                                | 0                                     | 0,00002           | PVS1,PM2,                                 | LP                  |
| DSP  | NM_004415.3 | p.Gln1567*        | Nonsense     | 1                                | 0                                     | 0                 | PVS1,PM2,                                 | LP                  |
| DSP  | NM_004415.3 | p.Gln1667Hisfs*14 | Frame-shift  | 2                                | 0                                     | 0                 | PVS1,PM2,PP1_Moderate,PS4_Supporting,     | P                   |
| DSP  | NM_004415.3 | p.Gln447*         | Nonsense     | 3                                | 0                                     | 0                 | PVS1,PM2,PS4_Supporting,                  | P                   |
| DSP  | NM_004415.3 | p.Gly36Alafs*12   | Frame-shift  | 1                                | 0                                     | 0                 | PVS1,PM2,                                 | LP                  |
| DSP  | NM_004415.3 | p.Ile1483Asnfs*14 | Frame-shift  | 1                                | 0                                     | 0                 | PVS1,PM2,                                 | LP                  |
| DSP  | NM_004415.3 | p.Leu1773Tyrfs*8  | Frame-shift  | 2                                | 0                                     | 0                 | PVS1,PM2,PS4_Moderate,                    | P                   |
| DSP  | NM_004415.3 | p.Leu547Trpfs*8   | Frame-shift  | 1                                | 0                                     | 0                 | PVS1,PM2,                                 | LP                  |
| DSP  | NM_004415.3 | p.Leu784*         | Nonsense     | 1                                | 0                                     | 0                 | PVS1,PM2,                                 | LP                  |
| DSP  | NM_004415.3 | p.Lys1564Asnfs*13 | Frame-shift  | 1                                | 0                                     | 0                 | PVS1,PM2,                                 | P                   |
| DSP  | NM_004415.3 | p.Tyr739Valfs*7   | Frame-shift  | 1                                | 0                                     | 0                 | PVS1,PM2,                                 | P                   |
| EMD  | NM_000117.2 | p.Val26Ala        | Missense     | 1                                | 0                                     | 0                 | PS4,PP1_Strong,PM2,PP3,                   | P                   |
| FKRP | NM_024301.4 | p.Pro89Ser        | Missense     | 1 <sup>#</sup>                   | 0                                     | 0,00003           | PM3, PM2, PP3, PP4                        | LP                  |
| FKRP | NM_024301.4 | p.Val300Ala       | Missense     | 1 <sup>#</sup>                   | 0                                     | 0,00037           | PM2,PM3,PP3,PP4,                          | LP                  |
| FLNC | NM_001458.4 | c.2929+5G>A       | Intronic     | 1                                | 0                                     | 0                 | PVS1_Strong,PM2,                          | LP                  |



| Gene | Transcript  | Protein change     | Variant type | Number of probands (this cohort) | HIC controls (FAF) n alleles = 10,508 | gnomAD FAF popmax | ACMG rules                                   | ACMG classification |
|------|-------------|--------------------|--------------|----------------------------------|---------------------------------------|-------------------|----------------------------------------------|---------------------|
| FLNC | NM_001458.4 | c.3965-2A>T        | Splicing     | 2                                | 0                                     | 0                 | PVS1_Strong,PM2,PS4_Supporting,              | P                   |
| FLNC | NM_001458.4 | c.4127+1delG       | Splicing     | 1                                | 0                                     | 0                 | PVS1_Strong,PM2,PP1,PS4_Supporting,          | P                   |
| FLNC | NM_001458.4 | c.4288+2T>G        | Splicing     | 1                                | 0                                     | 0                 | PVS1_Strong,PM2,PP1,PS4_Supporting,          | P                   |
| FLNC | NM_001458.4 | c.7251+1G>A        | Splicing     | 1                                | 0                                     | 0                 | PVS1_Strong,PM2,PP1_Moderate,PS4_Supporting, | P                   |
| FLNC | NM_001458.4 | p.Arg 1474Glyfs*42 | Frame-shift  | 1                                | 0                                     | 0                 | PVS1_Strong,PM2,                             | LP                  |
| FLNC | NM_001458.4 | p.Arg482*          | Nonsense     | 1                                | 0                                     | 0                 | PVS1_Strong,PM2,PP1_Moderate,PS4_Supporting, | P                   |
| FLNC | NM_001458.4 | p.Gln2499*         | Nonsense     | 1                                | 0                                     | 0                 | PVS1_Strong,PM2,                             | LP                  |
| FLNC | NM_001458.4 | p.Gly1800*         | Nonsense     | 2                                | 0                                     | 0                 | PVS1_Strong,PM2,PP1,PS4_Supporting,          | P                   |
| FLNC | NM_001458.4 | p.Gly201Valfs*36   | Frame-shift  | 1                                | 0                                     | 0                 | PVS1_Strong,PM2,                             | LP                  |
| FLNC | NM_001458.4 | p.Gly2544Alafs*71  | Frame-shift  | 1                                | 0                                     | 0                 | PVS1_Strong,PM2,                             | LP                  |
| FLNC | NM_001458.4 | p.His1205Thrfs*65  | Frame-shift  | 1                                | 0                                     | 0                 | PVS1_Strong,PM2,                             | LP                  |
| FLNC | NM_001458.4 | p.Lys737Serfs*11   | Frame-shift  | 2                                | 0                                     | 0                 | PVS1_Strong,PM2,PS4_Supporting,              | P                   |
| FLNC | NM_001458.4 | p.Phe1135Alafs*62  | Frame-shift  | 1                                | 0                                     | 0                 | PVS1_Strong,PM2,                             | LP                  |
| FLNC | NM_001458.4 | p.Pro963Argfs*26   | Frame-shift  | 1                                | 0                                     | 0,00003           | PVS1_Strong,PM2,PS4_Supporting,              | P                   |
| FLNC | NM_001458.4 | p.Trp744Argfs*4    | Frame-shift  | 1                                | 0                                     | 0                 | PVS1_Strong,PM2,                             | LP                  |
| FLNC | NM_001458.4 | p.Tyr1840*         | Nonsense     | 1                                | 0                                     | 0                 | PVS1_Strong,PM2,PP1,                         | P                   |
| FLNC | NM_001458.4 | p.Val2371Serfs*53  | Frame-shift  | 1                                | 0                                     | 0                 | PVS1_Strong,PM2,                             | LP                  |
| JPH2 | NM_020433.4 | p.Glu85Leu         | Missense     | 1                                | 0                                     | 0                 | PM2,PP1_Moderate,PP2,PP3,                    | LP                  |
| LMNA | NM_170707.3 | c.1158-1G>A        | Splicing     | 1                                | 0                                     | 0                 | PVS1,PM2,PP1_Moderate,PP1,                   | P                   |
| LMNA | NM_170707.3 | p.0?               | codon        | 1                                | 0                                     | 0                 | PVS1,PM2,PP1_Moderate,PP1,                   | P                   |
| LMNA | NM_170707.3 | p.Ala318Glyfs*162  | Frame-shift  | 1                                | 0                                     | 0                 | PVS1,PM2,                                    | LP                  |
| LMNA | NM_170707.3 | p.Arg190Gln        | Missense     | 1 <sup>#</sup>                   | 0                                     | 0                 | PP1_Strong,PM2,PS4_Moderate,PP1,PP2,PP3,PP5, | P                   |
| LMNA | NM_170707.3 | p.Arg190Trp        | Missense     | 3                                | 0                                     | 0                 | PS4,PP1_Strong,PM2,PP1,PP2,PP3,PP5,          | P                   |
| LMNA | NM_170707.3 | p.Arg216Cys        | Missense     | 1                                | 0                                     | 0,00003           | PM2,PS4_Moderate,PP1_Moderate,PP2,PP3,       | LP                  |
| LMNA | NM_170707.3 | p.Arg225*          | Nonsense     | 2                                | 0                                     | 0                 | PVS1,PS4,PP1_Strong,PM2,PP5,                 | P                   |
| LMNA | NM_170707.3 | p.Arg321*          | Nonsense     | 1                                | 0                                     | 0                 | PVS1,PS4,PP1_Strong,PM2,PP5,                 | P                   |
| LMNA | NM_170707.3 | p.Arg377Cys        | Missense     | 1                                | 0                                     | 0                 | PS4,PP1_Strong,PM2,PM5,PP3,PP5,              | P                   |
| LMNA | NM_170707.3 | p.Arg377His        | Missense     | 2                                | 0                                     | 0                 | PS4,PP1_Strong,PM2,PM5,PP3,PP5,              | P                   |
| LMNA | NM_170707.3 | p.Arg541Cys        | Missense     | 1                                | 0                                     | 0                 | PM2,PS4_Moderate,PP1,PP3,PP5,                | LP                  |
| LMNA | NM_170707.3 | p.Arg72Cys         | Missense     | 1 <sup>#</sup>                   | 0                                     | 0                 | PM2,PS4_Moderate,PP1,PP3,PP4,PP5,            | LP                  |
| LMNA | NM_170707.3 | p.Glu105Lys        | Missense     | 1                                | 0                                     | 0                 | PM2,PP2,PP3,PP4,PS4_Supporting,              | LP                  |
| LMNA | NM_170707.3 | p.Glu124Lys        | Missense     | 1                                | 0                                     | 0                 | PM2,PP1_Moderate,PP2,PP3,PP4,PS4_Supporting, | LP                  |
| LMNA | NM_170707.3 | p.Glu161Lys        | Missense     | 1                                | 0                                     | 0                 | PS4,PM2,PP1_Moderate,PP2,PP3,PP4,PP5,        | LP                  |

| Gene   | Transcript  | Protein change      | Variant type     | Number of probands (this cohort) | HIC controls (FAF) n alleles = 10,508 | gnomAD FAF popmax | ACMG rules                            | ACMG classification |
|--------|-------------|---------------------|------------------|----------------------------------|---------------------------------------|-------------------|---------------------------------------|---------------------|
| LMNA   | NM_170707.3 | p.Glu444*           | Nonsense         | 1                                | 0                                     | 0                 | PVS1,PM2,                             | LP                  |
| LMNA   | NM_170707.3 | p.Gly382=           | Splicing         | 1                                | 0                                     | 0                 | PS3,PM2,PS4_Moderate,PP3,PP5,         | LP                  |
| LMNA   | NM_170707.3 | p.Ser22*            | Nonsense         | 2                                | 0                                     | 0                 | PVS1,PM2,PS4_Supporting,              | P                   |
| LMNA   | NM_170707.3 | p.Ser437HisFs*2     | Frame-shift      | 1                                | 0                                     | 0                 | PVS1,PM2,PP1_Moderate,PS4_Supporting, | P                   |
| LMNA   | NM_170707.3 | p.Thr27Ile          | Missense         | 1                                | 0                                     | 0                 | PM2,PS4_Moderate,PP1,PP2,PP4,PP5,     | LP                  |
| LMNA   | NM_170707.3 | p.Trp514*           | Nonsense         | 3                                | 0                                     | 0                 | PVS1,PM2,PP1,PP5,PS4_Supporting,      | P                   |
| LMNA   | NM_170707.3 | p.Tyr81Thrfs*15     | Frame-shift      | 1                                | 0                                     | 0                 | PVS1,PM2,PP1_Moderate,PP4,            | P                   |
| MYBPC3 | NM_000256.3 | c.1224-19G>A        | Inotronic        | 1                                | 0                                     | 0,00019           | PS3,PS4,PM2,PP1_Moderate,PP5,         | P                   |
| MYBPC3 | NM_000256.3 | c.1226+1G>C         | Splicing         | 1                                | 0                                     | 0                 | PVS1,PM2,                             | LP                  |
| MYBPC3 | NM_000256.3 | c.2308+1G>A         | Splicing         | 5                                | 0                                     | 0                 | PVS1,PS4,PP1_Strong,PM2,              | P                   |
| MYBPC3 | NM_000256.3 | c.407-1G>A          | Splicing         | 1 <sup>#</sup>                   | 0                                     | 0,0001            | PVS1,PM2,PS4_Supporting,              | P                   |
| MYBPC3 | NM_000256.3 | p.Ala80delinsGlyGly | Inframe delins   | 1                                | 0                                     | 0                 | PM2,PM4,PS4_Moderate,PP1,             | LP                  |
| MYBPC3 | NM_000256.3 | p.Arg1271*          | Nonsense         | 1                                | 0                                     | 0,00003           | PVS1,PM2,PS4_Moderate,PP5,            | P                   |
| MYBPC3 | NM_000256.3 | p.Arg495Gly         | Missense         | 1                                | 0                                     | 0,00001           | PS4,PP1_Strong,PM2,PP3,PP5,           | P                   |
| MYBPC3 | NM_000256.3 | p.Arg820Trp         | Missense         | 1                                | 0                                     | 0,00003           | PM2,PS4_Moderate,PP1_Moderate,PP3,    | LP                  |
| MYBPC3 | NM_000256.3 | p.Arg891Alafs*160   | Frame-shift      | 1                                | 0                                     | 0                 | PVS1,PS4,PP1_Strong,PM2,PP5,          | P                   |
| MYBPC3 | NM_000256.3 | p.Asp75Asn          | Missense         | 1                                | 2 (0,0002)                            | 0,00004           | PS4,PM2,PP1,PP3,                      | LP                  |
| MYBPC3 | NM_000256.3 | p.Glu1156*          | Nonsense         | 1                                | 0                                     | 0                 | PVS1,PM2,                             | LP                  |
| MYBPC3 | NM_000256.3 | p.Gly758=           | Splicing         | 1 <sup>#</sup>                   | 0                                     | 0,00017           | PS3,PM2,PP1,PS4_Supporting,           | LP                  |
| MYBPC3 | NM_000256.3 | p.Gly868Ser         | Splicing         | 1                                | 1 (0,0001)                            | 0,00029           | PM2,PP3,PS4_Supporting,               | LP                  |
| MYBPC3 | NM_000256.3 | sHislille           | Inframe delins   | 1                                | 0                                     | 0                 | PM2,PM4,PM5,PS4_Supporting,           | LP                  |
| MYBPC3 | NM_000256.3 | p.Lys505del         | Inframe deletion | 1                                | 0                                     | 0,00003           | PS4,PM2,PM4,                          | LP                  |
| MYH7   | NM_000257.3 | p.Arg1193Cys        | Missense         | 1                                | 0                                     | 0                 | PM5,PM2,PS4_Supporting,PP3            | LP                  |
| MYH7   | NM_000257.3 | p.Arg1434Cys        | Missense         | 1                                | 0                                     | 0                 | PM2,PS4_Moderate,PP1,PP3              | LP                  |
| MYH7   | NM_000257.3 | p.Arg1608His        | Missense         | 2                                | 0                                     | 0,00006           | PM2,PS4_Supporting,PP1,PP3            | LP                  |
| MYH7   | NM_000257.3 | p.Arg1781His        | Missense         | 1 <sup>#</sup>                   | 1 (0,0001)                            | 0,00007           | PS4,PM2,PP1,PP5,                      | LP                  |
| MYH7   | NM_000257.3 | p.Arg243His         | Missense         | 1                                | 0                                     | 0,00003           | PM2,PM1,PS4_Supporting,PP3            | LP                  |
| MYH7   | NM_000257.3 | p.Arg453Cys         | Missense         | 1                                | 0                                     | 0                 | PS4,PS3,PM2,PP1_Moderate,PM1,PP3      | LP                  |
| MYH7   | NM_000257.3 | p.Arg723Gly         | Missense         | 1                                | 0                                     | 0                 | PS4,PM5,PM2,PP1_Moderate,PM1,PP3      | P                   |
| MYH7   | NM_000257.3 | p.Gln1381Pro        | Missense         | 4                                | 0                                     | 0                 | PM2,PS4_Supporting,PP1,PP3            | LP                  |
| MYH7   | NM_000257.3 | p.Glu 883Lys        | Missense         | 1                                | 0                                     | 0                 | PM1,PM2,PM5,PP3,                      | LP                  |
| MYH7   | NM_000257.3 | p.Glu1426Lys        | Missense         | 2                                | 0                                     | 0                 | PM2,PS4_Moderate,PP1,PP3              | LP                  |
| MYH7   | NM_000257.3 | p.Gly716Arg         | Missense         | 2                                | 0                                     | 0                 | PS4,PM2,PP1_Moderate,PM1,PP3          | P                   |

| Gene   | Transcript     | Protein change   | Variant type     | Number of probands (this cohort) | HIC controls (FAF) n alleles = 10,508 | gnomAD FAF popmax | ACMG rules                               | ACMG classification |
|--------|----------------|------------------|------------------|----------------------------------|---------------------------------------|-------------------|------------------------------------------|---------------------|
| MYH7   | NM_000257.3    | p.Ile457Met      | Missense         | 1                                | 0                                     | 0                 | PM5,PM2,PM1,PP3                          | LP                  |
| MYH7   | NM_000257.3    | p.Ile724Thr      | Missense         | 1                                | 0                                     | 0                 | PM2,PM1,PP1,PP3                          | P                   |
| MYH7   | NM_000257.3    | p.Phe252Leu      | Missense         | 1                                | 0                                     | 0                 | PM1,PM2,PM5,PP3,                         | LP                  |
| PKP2   | NM_004572.3    | c.1378+1G>A      | Splicing         | 1 <sup>#</sup>                   | 0                                     | 0                 | PVS1,PM2,                                | LP                  |
| PKP2   | NM_004572.3    | p.Asp460Asn      | Missense         | 1                                | 0                                     | 0                 | PS4,PP1_Strong,PM2,PP3,PP5,              | P                   |
| PKP2   | NM_004572.3    | p.Asn564Profs*53 | Frame-shift      | 1                                | 0                                     | 0                 | PVS1,PP1_Strong,PM2,PS4_Moderate,PP1,    | P                   |
| PKP2   | NM_004572.3    | p.Glu259Glyfs*77 | Frame-shift      | 2                                | 1 (0,0001)                            | 0                 | PVS1,PP1_Strong,PM2,PS4_Moderate,PP1,    | P                   |
| PKP2   | NM_004572.3    | p.Ser329Argfs*23 | Frame-shift      | 1 <sup>#</sup>                   | 0                                     | 0,00003           | PVS1,PS4,PP1_Strong,PM2,PP1,PP5,         | P                   |
| PLN    | NM_002667.4    | p.Arg14del       | Inframe deletion | 2                                | 0                                     | 0,00002           | PS3,PS4,PP1_Strong,PM2,PM4,PP5,          | P                   |
| PRDM16 | NM_022114.3    | p.Val629Glyfs*5  | Frame-shift      | 1                                | 0                                     | 0                 | PVS1_Strong,PM2,                         | LP                  |
| RBM20  | NM_001134363.2 | c.1337+2T>A      | Splicing         | 1                                | 0                                     | 0                 | PVS1,PM2,PS4_Supporting,                 | LP                  |
| RBM20  | NM_001134363.2 | c.3317-16G>A     | Splicing         | 2                                | 0                                     | 0                 | PVS1,PM2,PS4_Supporting,                 | LP                  |
| RBM20  | NM_001134363.2 | c.3452-2A>G      | Splicing         | 1                                | 0                                     | 0                 | PVS1,PM2,                                | LP                  |
| RBM20  | NM_001134363.2 | Gln93Hisfs*11    | Frame-shift      | 1                                | 0                                     | 0                 | PVS1,PM2,                                | LP                  |
| RBM20  | NM_001134363.2 | p.Arg634Gln      | Missense         | 1 <sup>#</sup>                   | 0                                     | 0,00004           | PP1_Strong,PM2,PM5,PS4_Moderate,PP3,PP5, | P                   |
| RBM20  | NM_001134363.2 | p.Arg634Trp      | Missense         | 8                                | 0                                     | 0                 | PS3,PS4,PP1_Strong,PM2,PM5,PP3,PP5,      | P                   |
| RBM20  | NM_001134363.2 | p.Arg636His      | Missense         | 2                                | 0                                     | 0                 | 5,                                       | P                   |
| RBM20  | NM_001134363.2 | p.Arg734Gly      | Missense         | 1                                | 0                                     | 0                 | PM1,PM2,PP2,PP3,                         | LP                  |
| RBM20  | NM_001134363.2 | p.Asp912Gly      | Missense         | 2                                | 0                                     | 0                 | PM1,PM2,PP1,PP3,PS4_Supporting,          | LP                  |
| RBM20  | NM_001134363.2 | p.Pro638Leu      | Missense         | 1                                | 0                                     | 0                 | PP1_Strong,PM1,PM2,PS4_Moderate,PP3,PP5, | P                   |
| RBM20  | NM_001134363.2 | p.Ser175Alafs*10 | Frame-shift      | 1                                | 0                                     | 0                 | PVS1,PM2,                                | LP                  |
| RBM20  | NM_001134363.2 | p.Tyr594*        | Nonsense         | 1 <sup>#</sup>                   | 0                                     | 0                 | PVS1,PM2,                                | LP                  |
| SGCD   | NM_000337.5    | p.Leu35Pro       | Missense         | 1 <sup>#</sup>                   | 0                                     | 0                 | PM2,PM3,PP3,PP4,                         | LP                  |
| SGCD   | NM_000337.5    | p.Ser83*         | Nonsense         | 1 <sup>#</sup>                   | 0                                     | 0                 | PVS1,PM2,PM3,PP4,                        | P                   |
| TBX20  | NM_001077653.2 | c.655-2A>G       | Splicing         | 1                                | 0                                     | 0                 | PVS1,PM2,                                | LP                  |
| TBX20  | NM_001077653.2 | p.Arg334*        | Nonsense         | 1                                | 0                                     | 0                 | PVS1,PM2,                                | LP                  |
| TBX20  | NM_001077653.2 | p.Gln407*        | Nonsense         | 1                                | 0                                     | 0                 | PVS1,PM2,                                | LP                  |
| TMEM43 | NM_024334.2    | p.Ser358Leu      | Missense         | 1                                | 0                                     | 0                 | PS3,PS4,PP1_Strong,PM2,PP3,PP5,          | P                   |
| TNNC1  | NM_003280.2    | p.Glu134Lys      | Missense         | 1                                | 0                                     | 0                 | PM2,PM5,PM6,PP3,                         | LP                  |
| TNNI3  | NM_000363.4    | p.Ala157Val      | Missense         | 1                                | 0                                     | 0                 | PS3,PS4,PP1_Strong,PM2,PP2,PP3,          | P                   |
| TNNI3  | NM_000363.4    | p.Glu67del       | Inframe deletion | 1                                | 0                                     | 0                 | PM2,PM4,PP2,PS4_Supporting,              | LP                  |
| TNNI3  | NM_000363.4    | p.Lys131del      | Inframe deletion | 1                                | 0                                     | 0                 | PM2,PM4,PP2,PS4_Supporting,              | LP                  |



| Gene  | Transcript     | Protein change     | Variant type     | Number of probands (this cohort) | HIC controls (FAF) n alleles = 10,508 | gnomAD FAF popmax | ACMG rules                                   | ACMG classification |
|-------|----------------|--------------------|------------------|----------------------------------|---------------------------------------|-------------------|----------------------------------------------|---------------------|
| TNNI3 | NM_000363.4    | p.Ser39Ilefs*2     | Frame-shift      | 1                                | 0                                     | 0,0001            | PVS1,PM2,                                    | LP                  |
| TNNT2 | NM_001001430.2 | p.Arg131Trp        | Missense         | 2                                | 0                                     | 0                 | PP2,PP3,PP5,                                 | P                   |
| TNNT2 | NM_001001430.2 | p.Arg141Gln        | Missense         | 2                                | 0                                     | 0                 | PP2,PP3,PP5,                                 | P                   |
| TNNT2 | NM_001001430.2 | p.Arg148Trp        | Missense         | 1                                | 0                                     | 0                 | PM1,PM2,PM5,PP1,PP2,PP3,                     | LP                  |
| TNNT2 | NM_001001430.2 | p.Arg159Gln        | Missense         | 1                                | 0                                     | 0                 | PM1,PM2,PP2,PP3,                             | LP                  |
| TNNT2 | NM_001001430.2 | p.Arg173Gln        | Missense         | 2                                | 0                                     | 0                 | PS3,PM1,PM2,PS4_Moderate,PP1,PP2,PP3,PP5,    | P                   |
| TNNT2 | NM_001001430.2 | p.Arg173Gly        | Missense         | 1                                | 0                                     | 0                 | PM1,PM2,PM5,PP2,PP3,                         | LP                  |
| TNNT2 | NM_001001430.2 | p.Arg173Trp        | Missense         | 1                                | 0                                     | 0                 | PP2,PP3,                                     | P                   |
| TNNT2 | NM_001001430.2 | p.Gly186Val        | Missense         | 1                                | 0                                     | 0                 | PM1,PM2,PP2,PP3,                             | LP                  |
| TNNT2 | NM_001001430.2 | p.Lys210del        | Inframe deletion | 1                                | 0                                     | 0                 | PS3,PS4,PP1_Strong,PM2,PM4,PM6,PP2,PP3,PP5,  | P                   |
| TNNT2 | NM_001001430.2 | p.Pro77Leu         | Missense         | 2                                | 1 (0,0001)                            | 0,00017           | PM2,PS4_Moderate,PP2,PP3,                    | LP                  |
| TPM1  | NM_001018005.1 | p.Asp230Asn        | Missense         | 1                                | 0                                     | 0                 | PS3,PP1_Strong,PM2,PS4_Moderate,PP2,PP3,PP5, | P                   |
| TPM1  | NM_001018005.1 | p.Leu113Val        | Missense         | 2                                | 0                                     | 0                 | PM2,PS4_Moderate,PP1,PP2,PP3,PP5,            | P                   |
| TPM1  | NM_001018005.1 | p.Thr201Met        | Missense         | 2                                | 0                                     | 0                 | PM2,PS4_Moderate,PP2,PP3,                    | LP                  |
| TTN   | NM_003319.4    | c.17086+1G>A       | Splicing         | 1                                | 0                                     | 0,00003           | PVS1_Strong,PM2,PP1,PS4_Supporting,          | P                   |
| TTN   | NM_003319.4    | c.29453-1G>A       | Splicing         | 2                                | 0                                     | 0,00005           | PVS1_Strong,PM2,                             | LP                  |
| TTN   | NM_003319.4    | IGTAA              | Splicing         | 2                                | 0                                     | 0                 | PVS1_Strong,PM2,                             | LP                  |
| TTN   | NM_003319.4    | c.32713+1G>A       | Splicing         | 1                                | 0                                     | 0                 | PVS1_Strong,PM2,                             | LP                  |
| TTN   | NM_003319.4    | c.32731+1G>A       | Splicing         | 1                                | 0                                     | 0                 | PVS1_Strong,PM2,                             | LP                  |
| TTN   | NM_003319.4    | p.Ala12453Serfs*14 | Frame-shift      | 1                                | 0                                     | 0                 | PVS1_Strong,PM2,PS4_Supporting,              | P                   |
| TTN   | NM_003319.4    | p.Ala19562Glufs*7  | Frame-shift      | 1                                | 0                                     | 0                 | PVS1_Strong,PM2,                             | LP                  |
| TTN   | NM_003319.4    | p.Ala8464Profs*3   | Frame-shift      | 1                                | 0                                     | 0                 | PVS1_Strong,PM2,                             | LP                  |
| TTN   | NM_003319.4    | p.Arg11576*        | Nonsense         | 1                                | 0                                     | 0                 | PVS1_Strong,PM2,PS4_Supporting,              | P                   |
| TTN   | NM_003319.4    | p.Arg12420*        | Nonsense         | 1                                | 0                                     | 0,00002           | PVS1_Strong,PM2,PP1,PS4_Supporting,          | P                   |
| TTN   | NM_003319.4    | p.Arg12539*        | Nonsense         | 1                                | 0                                     | 0,00001           | PVS1_Strong,PM2,                             | LP                  |
| TTN   | NM_003319.4    | p.Arg13434*        | Nonsense         | 2                                | 0                                     | 0,00002           | PVS1_Strong,PM2,PS4_Supporting,              | P                   |
| TTN   | NM_003319.4    | p.Arg14323*        | Nonsense         | 1                                | 0                                     | 0,00003           | PVS1_Strong,PM2,PS4_Supporting,              | P                   |
| TTN   | NM_003319.4    | p.Arg17482*        | Nonsense         | 2                                | 0                                     | 0                 | PVS1_Strong,PM2,                             | LP                  |
| TTN   | NM_003319.4    | p.Arg17658Valfs*11 | Frame-shift      | 2                                | 0                                     | 0                 | PVS1_Strong,PM2,                             | LP                  |
| TTN   | NM_003319.4    | p.Arg17691Serfs*2  | Frame-shift      | 1                                | 0                                     | 0                 | PVS1_Strong,PM2,                             | LP                  |
| TTN   | NM_003319.4    | p.Arg18349*        | Nonsense         | 1                                | 0                                     | 0,00001           | PVS1_Strong,PM2,PS4_Supporting,              | P                   |
| TTN   | NM_003319.4    | p.Arg19299*        | Nonsense         | 1                                | 0                                     | 0,00003           | PVS1_Strong,PM2,                             | LP                  |
| TTN   | NM_003319.4    | p.Arg19358*        | Nonsense         | 1                                | 0                                     | 0,00001           | PVS1_Strong,PM2,PS4_Supporting,              | P                   |

| Gene | Transcript  | Protein change     | Variant type | Number of probands (this cohort) | HIC controls (FAF) n alleles = 10,508 | gnomAD FAF popmax | ACMG rules                      | ACMG classification |
|------|-------------|--------------------|--------------|----------------------------------|---------------------------------------|-------------------|---------------------------------|---------------------|
| TTN  | NM_003319.4 | p.Arg19525*        | Nonsense     | 1                                | 0                                     | 0                 | PVS1_Strong,PM2,PS4_Supporting, | P                   |
| TTN  | NM_003319.4 | p.Arg19641*        | Nonsense     | 1                                | 0                                     | 0,00001           | PVS1_Strong,PM2,                | LP                  |
| TTN  | NM_003319.4 | p.Arg19714*        | Nonsense     | 2                                | 0                                     | 0                 | PVS1_Strong,PM2,PS4_Supporting, | P                   |
| TTN  | NM_003319.4 | p.Arg19949*        | Nonsense     | 2                                | 0                                     | 0,00001           | PVS1_Strong,PM2,PS4_Supporting, | P                   |
| TTN  | NM_003319.4 | p.Arg20820*        | Nonsense     | 1                                | 0                                     | 0                 | PVS1_Strong,PM2,                | LP                  |
| TTN  | NM_003319.4 | p.Arg21708*        | Nonsense     | 1                                | 0                                     | 0                 | PVS1_Strong,PM2,                | LP                  |
| TTN  | NM_003319.4 | p.Arg23307Lysfs*9  | Frame-shift  | 1                                | 0                                     | 0                 | PVS1_Strong,PM2,                | LP                  |
| TTN  | NM_003319.4 | p.Arg23702Glyfs*26 | Frame-shift  | 1                                | 0                                     | 0,00001           | PVS1_Strong,PM2,                | LP                  |
| TTN  | NM_003319.4 | p.Arg2460*         | Nonsense     | 1 <sup>#</sup>                   | 0                                     | 0                 | PVS1_Strong,PM2,                | LP                  |
| TTN  | NM_003319.4 | p.Arg25493Thrfs*10 | Frame-shift  | 1                                | 0                                     | 0                 | PVS1_Strong,PM2,                | LP                  |
| TTN  | NM_003319.4 | p.Arg26587*        | Nonsense     | 1                                | 0                                     | 0,00002           | PVS1_Strong,PM2,                | LP                  |
| TTN  | NM_003319.4 | p.Arg3886Serfs*20  | Frame-shift  | 1                                | 0                                     | 0                 | PVS1_Strong,PM2,                | P                   |
| TTN  | NM_003319.4 | p.Arg5014*         | Nonsense     | 1                                | 0                                     | 0,00001           | PVS1_Strong,PM2,                | LP                  |
| TTN  | NM_003319.4 | p.Arg5902*         | Nonsense     | 1                                | 0                                     | 0                 | PVS1_Strong,PM2,                | LP                  |
| TTN  | NM_003319.4 | p.Arg6833*         | Nonsense     | 1                                | 0                                     | 0,00001           | PVS1_Strong,PM2,                | LP                  |
| TTN  | NM_003319.4 | p.Arg7030*         | Nonsense     | 2                                | 0                                     | 0,00001           | PVS1_Strong,PM2,PS4_Supporting, | P                   |
| TTN  | NM_003319.4 | p.Arg8256Glnfs*22  | Frame-shift  | 1                                | 0                                     | 0                 | PVS1_Strong,PM2,                | LP                  |
| TTN  | NM_003319.4 | p.Arg8272*         | Nonsense     | 2                                | 0                                     | 0                 | PVS1_Strong,PM2,PS4_Supporting, | P                   |
| TTN  | NM_003319.4 | p.Arg8276*         | Nonsense     | 2 <sup>#</sup>                   | 0                                     | 0,00001           | PVS1_Strong,PM2,PS4_Supporting, | P                   |
| TTN  | NM_003319.4 | p.Arg8676*         | Nonsense     | 1                                | 0                                     | 0                 | PVS1_Strong,PM2,                | LP                  |
| TTN  | NM_003319.4 | p.Asn15727Glnfs*29 | Frame-shift  | 1                                | 0                                     | 0                 | PVS1_Strong,PM2,                | LP                  |
| TTN  | NM_003319.4 | p.Asn4176*         | Nonsense     | 2                                | 0                                     | 0                 | PVS1_Strong,PM2,PS4_Moderate,   | P                   |
| TTN  | NM_003319.4 | p.Asp13803Glufs*6  | Frame-shift  | 1                                | 0                                     | 0                 | PVS1_Strong,PM2,                | LP                  |
| TTN  | NM_003319.4 | p.Asp2143Thrfs*17  | Frame-shift  | 1                                | 0                                     | 0                 | PVS1_Strong,PM2,                | LP                  |
| TTN  | NM_003319.4 | p.Cys15522Argfs*8  | Frame-shift  | 1                                | 0                                     | 0                 | PVS1_Strong,PM2,                | LP                  |
| TTN  | NM_003319.4 | p.Gln11346*        | Nonsense     | 1                                | 0                                     | 0                 | PVS1_Strong,PM2,                | LP                  |
| TTN  | NM_003319.4 | p.Gln19243*        | Nonsense     | 1                                | 0                                     | 0                 | PVS1_Strong,PM2,                | LP                  |
| TTN  | NM_003319.4 | p.Gln26795*        | Nonsense     | 1                                | 0                                     | 0                 | PVS1_Strong,PM2,                | LP                  |
| TTN  | NM_003319.4 | p.Glu17490*        | Nonsense     | 2                                | 0                                     | 0                 | PVS1_Strong,PM2,PS4_Supporting, | P                   |
| TTN  | NM_003319.4 | p.Glu18482Lysfs*33 | Frame-shift  | 1                                | 0                                     | 0                 | PVS1_Strong,PM2,                | LP                  |
| TTN  | NM_003319.4 | p.Glu20947*        | Nonsense     | 1                                | 0                                     | 0                 | PVS1_Strong,PM2,                | LP                  |
| TTN  | NM_003319.4 | p.Glu21727Metfs*37 | Frame-shift  | 1                                | 0                                     | 0                 | PVS1_Strong,PM2,PS4_Supporting, | P                   |
| TTN  | NM_003319.4 | p.Glu3810*         | Nonsense     | 1                                | 0                                     | 0                 | PVS1_Strong,PM2,PS4_Supporting, | P                   |

| Gene | Transcript  | Protein change     | Variant type | Number of probands (this cohort) | HIC controls (FAF) n alleles = 10,508 | gnomAD FAF popmax | ACMG rules                      | ACMG classification |
|------|-------------|--------------------|--------------|----------------------------------|---------------------------------------|-------------------|---------------------------------|---------------------|
| TTN  | NM_003319.4 | p.Glu4090Argfs*7   | Frame-shift  | 1                                | 0                                     | 0                 | PVS1_Strong,PM2,                | LP                  |
| TTN  | NM_003319.4 | p.Glu7189Argfs*9   | Frame-shift  | 1                                | 1 (0,0001)                            | 0                 | PVS1_Strong,PM2,                | LP                  |
| TTN  | NM_003319.4 | p.Gly10458Serfs*5  | Frame-shift  | 1                                | 0                                     | 0                 | PVS1_Strong,PM2,                | LP                  |
| TTN  | NM_003319.4 | p.Gly14651Hisfs*6  | Frame-shift  | 2                                | 0                                     | 0                 | PVS1_Strong,PM2,PS4_Supporting, | P                   |
| TTN  | NM_003319.4 | p.Gly15350Glufs*26 | Frame-shift  | 1                                | 0                                     | 0                 | PVS1_Strong,PM2,                | LP                  |
| TTN  | NM_003319.4 | p.Gly6565*         | Nonsense     | 1                                | 0                                     | 0                 | PVS1_Strong,PM2,                | LP                  |
| TTN  | NM_003319.4 | p.His24188Argfs*8  | Frame-shift  | 1                                | 0                                     | 0                 | PVS1_Strong,PM2,                | P                   |
| TTN  | NM_003319.4 | p.His3553Glnfs*32  | Frame-shift  | 1                                | 0                                     | 0                 | PVS1_Strong,PM2,                | LP                  |
| TTN  | NM_003319.4 | p.His8135Profs*13  | Frame-shift  | 1                                | 0                                     | 0                 | PVS1_Strong,PM2,                | LP                  |
| TTN  | NM_003319.4 | p.Ile18440Phefs*20 | Frame-shift  | 1                                | 0                                     | 0                 | PVS1_Strong,PM2,                | LP                  |
| TTN  | NM_003319.4 | p.Ile13887*        | Nonsense     | 2                                | 0                                     | 0                 | PVS1_Strong,PM2,PS4_Supporting, | P                   |
| TTN  | NM_003319.4 | p.Ile15632Asnfs*3  | Frame-shift  | 1                                | 0                                     | 0                 | PVS1_Strong,PM2,                | LP                  |
| TTN  | NM_003319.4 | p.Ile18440Phefs*20 | Frame-shift  | 1                                | 0                                     | 0                 | PVS1_Strong,PM2,PS4_Supporting, | P                   |
| TTN  | NM_003319.4 | p.Leu12514Valfs*12 | Frame-shift  | 1                                | 0                                     | 0                 | PVS1_Strong,PM2,                | LP                  |
| TTN  | NM_003319.4 | p.Leu13208Thrfs*24 | Frame-shift  | 1                                | 0                                     | 0                 | PVS1_Strong,PM2,PS4_Supporting, | P                   |
| TTN  | NM_003319.4 | p.Leu16652Glufs*6  | Frame-shift  | 1                                | 0                                     | 0                 | PVS1_Strong,PM2,PS4_Supporting, | P                   |
| TTN  | NM_003319.4 | p.Leu19964Serfs*12 | Frame-shift  | 1                                | 0                                     | 0                 | PVS1_Strong,PM2,                | LP                  |
| TTN  | NM_003319.4 | p.Leu5317Valfs*2   | Frame-shift  | 1                                | 0                                     | 0                 | PVS1_Strong,PM2,                | LP                  |
| TTN  | NM_003319.4 | p.Leu7907Glyfs*30  | Frame-shift  | 1                                | 0                                     | 0                 | PVS1_Strong,PM2,                | LP                  |
| TTN  | NM_003319.4 | p.Leu9263Hisfs*5   | Frame-shift  | 1                                | 0                                     | 0                 | PVS1_Strong,PM2,PS4_Supporting, | P                   |
| TTN  | NM_003319.4 | p.Lys11132Glyfs*2  | Frame-shift  | 2                                | 0                                     | 0                 | PVS1_Strong,PM2,PS4_Supporting, | P                   |
| TTN  | NM_003319.4 | p.Lys13943Asnfs*2  | Frame-shift  | 1                                | 0                                     | 0                 | PVS1_Strong,PM2,PS4_Supporting, | P                   |
| TTN  | NM_003319.4 | p.Lys16797Argfs*25 | Frame-shift  | 1                                | 0                                     | 0                 | PVS1_Strong,PM2,                | LP                  |
| TTN  | NM_003319.4 | p.Lys22926Glufs*12 | Frame-shift  | 1                                | 0                                     | 0                 | PVS1_Strong,PM2,                | LP                  |
| TTN  | NM_003319.4 | p.Lys2361Asnfs*10  | Frame-shift  | 2                                | 0                                     | 0                 | PVS1_Strong,PM2,PP1             | P                   |
| TTN  | NM_003319.4 | p.Lys25446*        | Nonsense     | 1                                | 0                                     | 0                 | PVS1_Strong,PM2,                | LP                  |
| TTN  | NM_003319.4 | p.Lys26898Asnfs*9  | Frame-shift  | 1 <sup>#</sup>                   | 0                                     | 0                 | PVS1_Strong,PM2,                | LP                  |
| TTN  | NM_003319.4 | p.Lys4433Argfs*20  | Frame-shift  | 1                                | 0                                     | 0                 | PVS1_Strong,PM2,                | LP                  |
| TTN  | NM_003319.4 | p.Lys8000*         | Nonsense     | 1                                | 1 (0,0001)                            | 0                 | PVS1_Strong,PM2,                | LP                  |
| TTN  | NM_003319.4 | p.Met1529Serfs*6   | Frame-shift  | 1                                | 0                                     | 0,00001           | PVS1_Strong,PM2,                | LP                  |
| TTN  | NM_003319.4 | p.Phe19967Leufs*8  | Frame-shift  | 2                                | 0                                     | 0                 | PVS1_Strong,PM2,                | LP                  |
| TTN  | NM_003319.4 | p.Pro10719Argfs*5  | Frame-shift  | 1                                | 0                                     | 0,00001           | PVS1_Strong,PM2,                | LP                  |
| TTN  | NM_003319.4 | p.Pro11634Glnfs*70 | Frame-shift  | 1                                | 0                                     | 0                 | PVS1_Strong,PM2,                | LP                  |

| <i>Gene</i> | <i>Transcript</i> | <i>Protein change</i> | <i>Variant type</i> | Number of probands (this cohort) | HIC controls (FAF) n alleles = 10,508 | gnomAD FAF popmax | ACMG rules                      | ACMG classification |
|-------------|-------------------|-----------------------|---------------------|----------------------------------|---------------------------------------|-------------------|---------------------------------|---------------------|
| <i>TTN</i>  | NM_003319.4       | p.Pro18608Glnfs*3     | Frame-shift         | 1                                | 0                                     | 0                 | PVS1_Strong,PM2,                | LP                  |
| <i>TTN</i>  | NM_003319.4       | p.Pro19320Leufs*4     | Frame-shift         | 1                                | 0                                     | 0                 | PVS1_Strong,PM2,                | LP                  |
| <i>TTN</i>  | NM_003319.4       | p.Ser13459Leufs*28    | Frame-shift         | 1                                | 0                                     | 0                 | PVS1_Strong,PM2,PP1             | P                   |
| <i>TTN</i>  | NM_003319.4       | p.Ser13517Valfs*3     | Frame-shift         | 1                                | 0                                     | 0                 | PVS1_Strong,PM2,                | LP                  |
| <i>TTN</i>  | NM_003319.4       | p.Ser14999Argfs*13    | Frame-shift         | 1                                | 0                                     | 0                 | PVS1_Strong,PM2,                | LP                  |
| <i>TTN</i>  | NM_003319.4       | p.Ser15484*           | Nonsense            | 1                                | 0                                     | 0                 | PVS1_Strong,PM2,                | LP                  |
| <i>TTN</i>  | NM_003319.4       | p.Ser22260*           | Nonsense            | 1                                | 0                                     | 0                 | PVS1_Strong,PM2,                | LP                  |
| <i>TTN</i>  | NM_003319.4       | p.Ser22686Lysfs*5     | Frame-shift         | 2                                | 0                                     | 0                 | PVS1_Strong,PM2,                | LP                  |
| <i>TTN</i>  | NM_003319.4       | p.Ser26322*           | Nonsense            | 1 <sup>#</sup>                   | 0                                     | 0                 | PVS1_Strong,PM2,                | LP                  |
| <i>TTN</i>  | NM_003319.4       | p.Ser6648Leufs*2      | Frame-shift         | 1                                | 0                                     | 0                 | PVS1_Strong,PM2,                | LP                  |
| <i>TTN</i>  | NM_003319.4       | p.Thr25963Trpfs*3     | Frame-shift         | 2                                | 0                                     | 0                 | PVS1_Strong,PM2,                | LP                  |
| <i>TTN</i>  | NM_003319.4       | p.Trp12516Cysfs*16    | Frame-shift         | 1                                | 0                                     | 0                 | PVS1_Strong,PM2,                | LP                  |
| <i>TTN</i>  | NM_003319.4       | p.Trp13407*           | Nonsense            | 1                                | 0                                     | 0                 | PVS1_Strong,PM2,                | LP                  |
| <i>TTN</i>  | NM_003319.4       | p.Trp13432*           | Nonsense            | 1                                | 0                                     | 0                 | PVS1_Strong,PM2,                | LP                  |
| <i>TTN</i>  | NM_003319.4       | p.Trp14196*           | Nonsense            | 1                                | 0                                     | 0                 | PVS1_Strong,PM2,PS4_Supporting, | P                   |
| <i>TTN</i>  | NM_003319.4       | p.Trp15105*           | Nonsense            | 1                                | 0                                     | 0                 | PVS1_Strong,PM2,                | LP                  |
| <i>TTN</i>  | NM_003319.4       | p.Trp16080*           | Nonsense            | 1 <sup>#</sup>                   | 0                                     | 0                 | PVS1_Strong,PM2,PS4_Supporting, | P                   |
| <i>TTN</i>  | NM_003319.4       | p.Trp17639*           | Nonsense            | 1                                | 0                                     | 0                 | PVS1_Strong,PM2,                | LP                  |
| <i>TTN</i>  | NM_003319.4       | p.Trp19433*           | Nonsense            | 1                                | 0                                     | 0                 | PVS1_Strong,PM2,PS4_Supporting, | P                   |
| <i>TTN</i>  | NM_003319.4       | p.Trp24348*           | Nonsense            | 1                                | 0                                     | 0                 | PVS1_Strong,PM2,                | LP                  |
| <i>TTN</i>  | NM_003319.4       | p.Trp5909*            | Nonsense            | 1                                | 0                                     | 0                 | PVS1_Strong,PM2,PP1             | P                   |
| <i>TTN</i>  | NM_003319.4       | p.Trp7037*            | Nonsense            | 1                                | 0                                     | 0                 | PVS1_Strong,PM2,                | LP                  |
| <i>TTN</i>  | NM_003319.4       | p.Trp7111*            | Nonsense            | 1 <sup>#</sup>                   | 0                                     | 0                 | PVS1_Strong,PM2,                | LP                  |
| <i>TTN</i>  | NM_003319.4       | p.Trp7333*            | Nonsense            | 1                                | 0                                     | 0,00001           | PVS1_Strong,PM2,                | LP                  |
| <i>TTN</i>  | NM_003319.4       | p.Trp8041*            | Nonsense            | 1                                | 0                                     | 0                 | PVS1_Strong,PM2,                | LP                  |
| <i>TTN</i>  | NM_003319.4       | p.Tyr10450*           | Nonsense            | 1                                | 0                                     | 0                 | PVS1_Strong,PM2,                | LP                  |
| <i>TTN</i>  | NM_003319.4       | p.Tyr1346*            | Nonsense            | 1                                | 0                                     | 0                 | PVS1_Strong,PM2,                | LP                  |
| <i>TTN</i>  | NM_003319.4       | p.Tyr15839*           | Nonsense            | 1                                | 0                                     | 0                 | PVS1_Strong,PM2,                | LP                  |
| <i>TTN</i>  | NM_003319.4       | p.Tyr17457*           | Nonsense            | 1                                | 0                                     | 0                 | PVS1_Strong,PM2,                | LP                  |
| <i>TTN</i>  | NM_003319.4       | p.Tyr18140*           | Nonsense            | 1                                | 0                                     | 0                 | PVS1_Strong,PM2,                | LP                  |
| <i>TTN</i>  | NM_003319.4       | p.Tyr24298*           | Nonsense            | 1                                | 0                                     | 0,00001           | PVS1_Strong,PM2,                | LP                  |
| <i>TTN</i>  | NM_003319.4       | p.Tyr3186Cysfs*5      | Frame-shift         | 1                                | 0                                     | 0                 | PVS1_Strong,PM2,PS4_Supporting, | P                   |
| <i>TTN</i>  | NM_003319.4       | p.Tyr4119*            | Nonsense            | 1                                | 0                                     | 0                 | PVS1_Strong,PM2,PS4_Supporting, | P                   |



| <i>Gene</i> | <i>Transcript</i> | <i>Protein change</i> | <i>Variant type</i> | <i>Number of probands (this cohort)</i> | <i>HIC controls (FAF) n alleles = 10,508</i> | <i>gnomAD FAF popmax</i> | <i>ACMG rules</i>               | <i>ACMG classification</i> |
|-------------|-------------------|-----------------------|---------------------|-----------------------------------------|----------------------------------------------|--------------------------|---------------------------------|----------------------------|
| <i>TTN</i>  | NM_003319.4       | p.Tyr9177*            | Nonsense            | 1                                       | 0                                            | 0                        | PVS1_Strong,PM2,                | LP                         |
| <i>TTN</i>  | NM_003319.4       | p.Tyr9697*            | Nonsense            | 1                                       | 0                                            | 0                        | PVS1_Strong,PM2,PS4_Supporting, | P                          |
| <i>TTN</i>  | NM_003319.4       | p.Tyr983*             | Nonsense            | 1                                       | 0                                            | 0                        | PVS1_Strong,PM2,                | LP                         |
| <i>TTN</i>  | NM_003319.4       | p.Val12642Glyfs*19    | Frame-shift         | 1                                       | 0                                            | 0                        | PVS1_Strong,PM2,                | LP                         |
| <i>TTN</i>  | NM_003319.4       | p.Val13475Trpfs*13    | Frame-shift         | 1                                       | 0                                            | 0                        | PVS1_Strong,PM2,                | LP                         |
| <i>TTN</i>  | NM_003319.4       | p.Val16403Glufs*33    | Frame-shift         | 1                                       | 0                                            | 0                        | PVS1_Strong,PM2,                | LP                         |
| <i>TTN</i>  | NM_003319.4       | p.Val23035Leufs*13    | Frame-shift         | 1                                       | 0                                            | 0                        | PVS1_Strong,PM2,                | LP                         |
| <i>TTN</i>  | NM_003319.4       | p.Val24684*           | Nonsense            | 1                                       | 0                                            | 0                        | PVS1_Strong,PM2,                | LP                         |
| <i>TTN</i>  | NM_003319.4       | p.Val26578Alafs*5     | Frame-shift         | 1 <sup>#</sup>                          | 0                                            | 0                        | PVS1_Strong,PM2,                | LP                         |
| <i>TTN</i>  | NM_003319.4       | p.Val3023Tyrf*23      | Frame-shift         | 1                                       | 0                                            | 0                        | PVS1_Strong,PM2,                | LP                         |

<sup>#</sup> Variant identified in a patient with another P/LP variant (digenic or compound heterozygosis)



**List of pathogenic and likely pathogenic variables identified in the validation cohort**

| Gene    | Transcript  | Protein change    | Variant type     | Number of probands (this cohort) | ACMG Pathogenicity | ACMG rules                                   |
|---------|-------------|-------------------|------------------|----------------------------------|--------------------|----------------------------------------------|
| ACTC1   | NM_005159.4 | p.Ile252Thr       | Nonsynonymous    | 2                                | LP                 | PM2,PP1_Moderate,PP4,PS4_Supporting,         |
| BAG3    | NM_004281.3 | p.Arg309*         | Nonsense         | 2                                | P                  | PVS1,PM2,PS4_Moderate,PP1,PP5,               |
| BAG3    | NM_004281.3 | p.Gln304*         | Nonsense         | 2                                | P                  | PVS1,PM2,PP1,PP5,                            |
| CACNA1C | NM_199460.3 | c.2914-1G>T       | Splicing         | 1                                | LP                 | PVS1,PM2,                                    |
| DES     | NM_001927.3 | p.Gly411Argfs*34  | Frameshift       | 1                                | LP                 | PVS1,PM2,                                    |
| DES     | NM_001927.3 | p.Gly437Valfs*10  | Frameshift       | 1                                | LP                 | PVS1,PM2,                                    |
| DMD     | NM_004006.2 | c.6118-3C>A       | Splicing         | 1                                | LP                 | PVS1,PM2,                                    |
| DMD     | NM_004006.2 | Del exons 48-49   | CNVs             | 2                                | P                  | PVS1,PM2,PS4_Supporting,                     |
| DMD     | NM_004006.2 | Del exons 66-74   | CNVs             | 1                                | P                  | PVS1,PM2,PS4_Supporting,                     |
| DMD     | NM_004006.2 | p.Trp3276*        | Nonsense         | 1                                | P                  | PVS1,PM2,PP4,                                |
| DSC2    | NM_024422.4 | p.Ala800Leufs*56  | Frameshift       | 2                                | LP                 | PVS1_Strong,PM2,                             |
| DSC2    | NM_024422.4 | p.Asp179Gly       | Nonsynonymous    | 1                                | LP                 | PM2,PS4_Moderate,PP1,PP3,                    |
| DSC2    | NM_024422.4 | p.Gly8Argfs*23    | Frameshift       | 1                                | LP                 | PVS1_Strong,PM2,                             |
| DSG2    | NM_001943.5 | p.Arg46Gln        | Nonsynonymous    | 1                                | P                  | PS4,PM2,PM5,PP1_Moderate,PP3,                |
| DSG2    | NM_001943.5 | p.Glu896Lysfs*8   | Frameshift       | 1                                | LP                 | PVS1_Strong,PM2,                             |
| DSP     | NM_004415.3 | p.Arg1934*        | Nonsense         | 1                                | P                  | PVS1,PM2,PP1,PS4_Supporting,                 |
| DSP     | NM_004415.3 | p.Arg2160*        | Nonsense         | 1                                | P                  | PVS1,PM2,PS4_Supporting,                     |
| DSP     | NM_004415.3 | p.Gln1262*        | Nonsense         | 2                                | P                  | PVS1,PM2,PS4_Supporting,                     |
| DSP     | NM_004415.3 | p.Gln631*         | Nonsense         | 1                                | LP                 | PVS1,PM2,                                    |
| DSP     | NM_004415.3 | p.Gly2133Valfs*2  | Frameshift       | 1                                | LP                 | PVS1,PM2,                                    |
| DSP     | NM_004415.3 | p.Ile120Asnfs*16  | Frameshift       | 1                                | LP                 | PVS1,PM2,                                    |
| DSP     | NM_004415.3 | p.Ile2631Asnfs*13 | Frameshift       | 1                                | LP                 | PVS1,PM2,                                    |
| DSP     | NM_004415.3 | p.Ser2591Argfs*11 | Frameshift       | 2                                | P                  | PVS1,PM2,PS4_Supporting,                     |
| DSP     | NM_004415.3 | p.Val1128Glyfs*5  | Frameshift       | 1                                | P                  | PVS1,PM2,PS4_Supporting,                     |
| EMD     | NM_000117.2 | p.Lys37del        | Inframe deletion | 1                                | LP                 | PM2,PP1_Moderate,PP4,PS4_Supporting,         |
| FLNC    | NM_001458.4 | c.3791-1G>A       | Splicing         | 6                                | P                  | PVS1_Strong,PM2,PS4_Moderate,                |
| FLNC    | NM_001458.4 | c.5842+2T>A       | Splicing         | 2                                | P                  | PVS1_Strong,PM2,PS4_Supporting,              |
| FLNC    | NM_001458.4 | c.7251+1G>A       | Splicing         | 1                                | P                  | PVS1_Strong,PM2,PP1_Moderate,PS4_Supporting, |
| FLNC    | NM_001458.4 | c.7252-2A>G       | Splicing         | 1                                | LP                 | PVS1_Strong,PM2,                             |
| FLNC    | NM_001458.4 | p.Arg1370*        | Nonsense         | 1                                | LP                 | PVS1_Strong,PM2,                             |
| FLNC    | NM_001458.4 | p.Arg2326*        | Nonsense         | 1                                | P                  | PM2,PP1_Moderate,PP4,PS4_Supporting,         |
| FLNC    | NM_001458.4 | p.Arg269*         | Nonsense         | 1                                | P                  | PM2,PP1_Moderate,PP4,PS4_Supporting,         |
| FLNC    | NM_001458.4 | p.Asp2703Trpfs    | Frameshift       | 1                                | LP                 | PM2,PM4,PP1,PS4_Supporting,                  |
| FLNC    | NM_001458.4 | p.Gln1956*        | Nonsense         | 1                                | LP                 | PVS1_Strong,PM2,                             |

| Gene   | Transcript  | Protein change    | Variant type  | Number of probands (this cohort) | ACMG Pathogenicity | ACMG rules                                       |
|--------|-------------|-------------------|---------------|----------------------------------|--------------------|--------------------------------------------------|
| FLNC   | NM_001458.4 | p.Glu151*         | Nonsense      | 1                                | LP                 | PVS1_Strong,PM2,                                 |
| FLNC   | NM_001458.4 | p.Gly2070Ser      | Nonsynonymous | 1                                | LP                 | PM2,PP3,PP4,PP5,PS4_Supporting,                  |
| FLNC   | NM_001458.4 | p.Pro2081Leufs*2  | Frameshift    | 1                                | LP                 | PVS1_Strong,PM2,                                 |
| FLNC   | NM_001458.4 | p.Pro2081Lfs*2    | Frameshift    | 2                                | LP                 | PVS1_Strong,PM2,                                 |
| FLNC   | NM_001458.4 | p.Pro2298fs       | Frameshift    | 1                                | LP                 | PVS1_Strong,PM2,                                 |
| FLNC   | NM_001458.4 | p.Ser1985*        | Nonsense      | 1                                | LP                 | PVS1_Strong,PM2,PS4_Supporting,                  |
| FLNC   | NM_001458.4 | p.Tyr2381Glyfs    | Frameshift    | 1                                | P                  | PVS1_Strong,PM2,PP1_Moderate,PS4_Supporting,     |
| FLNC   | NM_001458.4 | p.Val2290Argfs*23 | Frameshift    | 3                                | P                  | PVS1_Strong,PM2,PS4_Supporting,                  |
| GLA    |             | p.Phe113Leu       | Nonsynonymous | 1                                | P                  | PS3,PS4,PM2,PP3,PP4,                             |
| LMNA   | NM_170707.3 | c.1608+1G>T       | Splicing      | 1                                | P                  | PVS1,PM2,PP4,PS4_Supporting,                     |
| LMNA   | NM_170707.3 | c.357-2A>G        | Splicing      | 1                                | P                  | PVS1,PM2,PS4_Supporting,                         |
| LMNA   | NM_170707.3 | p.Arg190Gln       | Nonsynonymous | 1                                | P                  | PP1_Strong,PM2,PS4_Moderate,PP1,PP2,PP3,PP5,     |
| LMNA   | NM_170707.3 | p.Arg190Trp       | Nonsynonymous | 3                                | P                  | PS4,PP1_Strong,PM2,PP1,PP2,PP3,PP5,              |
| LMNA   | NM_170707.3 | p.Arg216Cys       | Nonsynonymous | 1                                | P                  | PM2,PS4_Moderate,PP1_Moderate,PP2,PP3,PP4,       |
| LMNA   | NM_170707.3 | p.Arg321Glufs*159 | Frameshift    | 1                                | P                  | PVS1,PM2,PP4,                                    |
| LMNA   | NM_170707.3 | p.Arg331Gln       | Nonsynonymous | 1                                | LP                 | PM2,PS4_Moderate,PP2,PP3,PP4,                    |
| LMNA   | NM_170707.3 | p.Arg377Leu       | Nonsynonymous | 1                                | P                  | PM2,PM5,PS4_Moderate,PP2,PP3,PP4,                |
| LMNA   | NM_170707.3 | p.Arg89Leu        | Nonsynonymous | 1                                | LP                 | PM2,PS4_Moderate,PP1,PP2,PP3,PP4,                |
| LMNA   | NM_170707.3 | p.Asn195Tyr       | Nonsynonymous | 1                                | LP                 | PM2,PM5,PP2,PP3,PP4,                             |
| LMNA   | NM_170707.3 | p.Glu105Leu       | Nonsynonymous | 3                                | LP                 | PM2,PP2,PP3,PP4,PS4_Supporting,                  |
| LMNA   | NM_170707.3 | p.Glu161Lys       | Nonsynonymous | 5                                | P                  | PS4,PM2,PP1_Moderate,PP2,PP3,PP4,PP5,            |
| LMNA   | NM_170707.3 | p.Glu317Lys       | Nonsynonymous | 1                                | P                  | PS4,PM1,PM2,PP1_Moderate,PP2,PP3,PP4,            |
| LMNA   | NM_170707.3 | p.Glu347Lys       | Nonsynonymous | 1                                | LP                 | PS4,PM2,PS4_Moderate,PP2,PP3,PP4,                |
| LMNA   | NM_170707.3 | p.Gly382=         | Splicing      | 2                                | LP                 | PS3,PM2,PS4_Moderate,PP3,PP5,                    |
| LMNA   | NM_170707.3 | p.Val70Serfs*25   | Frameshift    | 1                                | P                  | PVS1,PM2,PP1,PP4,                                |
| MyBPC3 | NM_000256.3 | p.Arg1022Pro      | Nonsynonymous | 1                                | P                  | PS4,PM2,PM5,PP1_Moderate,PP3,                    |
| MyBPC3 | NM_000256.3 | p.Cys566Arg       | Nonsynonymous | 1                                | LP                 | PM2,PP1_Moderate,PP3,PS4_Supporting,             |
| MyBPC3 | NM_000256.3 | p.Trp792Valfs*41  | Frameshift    | 1                                | P                  | PVS1,PS4,PM2,PP1_Moderate,                       |
| MYH7   | NM_000257.3 | c.732+1G>A        | Splicing      | 1                                | LP                 | PVS1_Moderate,PM2,PS4_Moderate,PP1_Moderate,PM1, |
| MYH7   | NM_000257.3 | p.Arg1434Cys      | Nonsynonymous | 1                                | LP                 | PM2,PS4_Moderate,PP1,PP3                         |
| MYH7   | NM_000257.3 | p.Arg1500Trp      | Nonsynonymous | 1                                | LP                 | PM5,PM2,PS4_Supporting,PP1,PP3                   |
| MYH7   | NM_000257.3 | p.Arg237Trp       | Nonsynonymous | 1                                | LP                 | PM2,PM1,PS4_Supporting,PP3                       |
| MYH7   | NM_000257.3 | p.Arg403Trp       | Nonsynonymous | 2                                | P                  | PS4,PS3,PM2,PP1_Moderate,PP3                     |
| MYH7   | NM_000257.3 | p.Arg723Cys       | Nonsynonymous | 1                                | P                  | PS4,PM5,PM2,PP1_Moderate,PM1,PP3                 |

| Gene   | Transcript     | Protein change      | Variant type     | Number of probands (this cohort) | ACMG Pathogenicity | ACMG rules                                         |
|--------|----------------|---------------------|------------------|----------------------------------|--------------------|----------------------------------------------------|
| MYH7   | NM_000257.3    | p.Arg904His         | Nonsynonymous    | 1                                | LP                 | PM5,PM2,PM1,PS4_Supporting,PP3                     |
| MYH7   | NM_000257.3    | p.Glu1286Lys        | Nonsynonymous    | 1                                | LP                 | PM2,PP2,PP3,PP5,PS4_Supporting,                    |
| MYH7   | NM_000257.3    | p.Glu1426Lys        | Nonsynonymous    | 1                                | LP                 | PM2,PS4_Moderate,PP1,PP3                           |
| MYH7   | NM_000257.3    | p.Glu1801Lys        | Nonsynonymous    | 1                                | LP                 | PM2,PS4_Moderate,PP1,PP3                           |
| MYH7   | NM_000257.3    | p.Gly1057Ser        | Nonsynonymous    | 1                                | LP                 | PM2,PP1,PP2,PP3,PS4_Supporting,                    |
| MYH7   | NM_000257.3    | p.Gly733Arg         | Nonsynonymous    | 1                                | LP                 | PM1,PM2,PP2,PP3,                                   |
| PKP2   | NM_004572.3    | p.Lys672Argfs*12    | Frameshift       | 1                                | P                  | PVS1,PS4,PM2,PP1,                                  |
| PKP2   | NM_004572.3    | Whole gene deletion | CNVs             | 1                                | P                  | PVS1,PM2,PS4_Supporting,                           |
| PLN    | NM_002667.4    | p.Arg14del          | Inframe deletion | 2                                | P                  | PS3,PS4,PP1_Strong,PM2,PM4,PP5,                    |
| PRDM16 | NM_022114.3    | 2603+2T>C           | Splicing         | 1                                | LP                 | PVS1_Strong,PM2,                                   |
| RBM20  | NM_001134363.2 | p.Arg634Trp         | Nonsynonymous    | 2                                | P                  | PS3,PS4,PP1_Strong,PM2,PM5,PP3,PP5,                |
| RBM20  | NM_001134363.2 | p.Arg636His         | Nonsynonymous    | 3                                | P                  | PP1_Strong,PM1,PM2,PM5,PS4_Moderate,PP3,PP5,       |
| RBM20  | NM_001134363.2 | p.Arg688*           | Nonsense         | 1                                | LP                 | PVS1_Strong,PM2,                                   |
| RBM20  | NM_001134363.2 | p.Pro140Argfs*3     | Frameshift       | 1                                | LP                 | PVS1_Strong,PM2,                                   |
| SCN5A  | NM_198056.2    | p.Ala204Val         | Nonsynonymous    | 1                                | LP                 | PM2,PP2,PP3,PP4,PS4_Supporting,                    |
| SCN5A  | NM_198056.2    | p.Arg222Gln         | Nonsynonymous    | 2                                | P                  | PS3,PS4,PM2,PP1_Moderate,PP3,                      |
| SCN5A  | NM_198056.2    | p.Gly752Arg         | Nonsynonymous    | 1                                | P                  | PS3,PM2,PP1,PP2,PP3,PS4_Supporting,                |
| SCN5A  | NM_198056.2    | p.Val1353Met        | Nonsynonymous    | 1                                | LP                 | PM1,PM2,PP3,PS4_Supporting,                        |
| TNNC1  | NM_003280.2    | p.Asn144Asp         | Nonsynonymous    | 1                                | LP                 | PM2,PM5,PM6,PP3,                                   |
| TNNT2  | NM_001001430.2 | p.Arg139His         | Nonsynonymous    | 1                                | LP                 | PM1,PM2,PM5,PP1,PP3,PS4_Supporting,                |
| TNNT2  | NM_001001430.2 | p.Arg141Gln         | Nonsynonymous    | 1                                | P                  | PM1,PM2,PM5,PP1,PP3,PS4_Supporting,                |
| TNNT2  | NM_001001430.2 | p.Arg148Trp         | Nonsynonymous    | 1                                | LP                 | PM1,PM2,PP1,PP3,PS4_Supporting,                    |
| TNNT2  | NM_001001430.2 | p.Arg173Trp         | Nonsynonymous    | 12                               | P                  | PS3,PM1,PM2,PM5,PS4_Moderate,PP1_Moderate,PP2,PP3, |
| TNNT2  | NM_001001430.2 | p.Arg196Gln         | Nonsynonymous    | 6                                | LP                 | PM1,PM2,PM5,PP3,PS4_Supporting,                    |
| TNNT2  | NM_001001430.2 | p.Glu161Lys         | Nonsynonymous    | 1                                | LP                 | PM1,PM2,PP2,PP3,                                   |
| TNNT2  | NM_001001430.2 | p.Lys207Ilefs*13    | Frameshift       | 2                                | LP                 | PVS1_Strong,PM2,PS4_Supporting,                    |
| TPM1   | NM_001018005.1 | p.Asp84Asn          | Nonsynonymous    | 1                                | LP                 | PM2,PP1,PP2,PP3,PS4_Supporting,                    |
| TPM1   | NM_001018005.1 | p.Glu62Gln          | Nonsynonymous    | 2                                | LP                 | PM2,PP1,PP2,PP3,PS4_Supporting,                    |
| TPM1   | NM_001018005.1 | p.Val95Ala          | Nonsynonymous    | 1                                | LP                 | PM2,PP1_Moderate,PP2,PP3,PS4_Supporting,           |
| TTN    | NM_003319.4    | c.13282+1G>A        | Splicing         | 2                                | LP                 | PVS1_Strong,PM2,                                   |
| TTN    | NM_003319.4    | c.14414-2A>C        | Splicing         | 1                                | LP                 | PVS1_Strong,PM2,                                   |
| TTN    | NM_003319.4    | c.19501+2T>C        | Splicing         | 1                                | LP                 | PVS1_Strong,PM2,                                   |
| TTN    | NM_003319.4    | c.25808-1G>A        | Splicing         | 2                                | LP                 | PVS1_Strong,PM2,                                   |
| TTN    | NM_003319.4    | c.28074+3A>G        | Splicing         | 1                                | LP                 | PVS1_Strong,PM2,                                   |





| Gene | Transcript  | Protein change     | Variant type | Number of probands (this cohort) | ACMG Pathogenicity | ACMG rules                      |
|------|-------------|--------------------|--------------|----------------------------------|--------------------|---------------------------------|
| TTN  | NM_003319.4 | c.30652+4delGTAA   | Splicing     | 1                                | LP                 | PVS1_Strong,PM2,                |
| TTN  | NM_003319.4 | c.32731+1G>A       | Splicing     | 1                                | LP                 | PVS1_Strong,PM2,                |
| TTN  | NM_003319.4 | c.36599-1G>A       | Splicing     | 3                                | P                  | PVS1_Strong,PM2,PS4_Supporting, |
| TTN  | NM_003319.4 | p. Gln25869*       | Nonsense     | 1                                | LP                 | PVS1_Strong,PM2,                |
| TTN  | NM_003319.4 | p. Ser22759*       | Nonsense     | 1                                | LP                 | PVS1_Strong,PM2,                |
| TTN  | NM_003319.4 | p. Trp2694*        | Nonsense     | 1                                | LP                 | PVS1_Strong,PM2,                |
| TTN  | NM_003319.4 | p.Ala10378Leufs*2  | Frameshift   | 2                                | P                  | PVS1_Strong,PM2,PS4_Supporting, |
| TTN  | NM_003319.4 | p.Ala10766Glufs*3  | Frameshift   | 1                                | LP                 | PVS1_Strong,PM2,                |
| TTN  | NM_003319.4 | p.Ala13034Valfs*13 | Frameshift   | 1                                | LP                 | PVS1_Strong,PM2,                |
| TTN  | NM_003319.4 | p.Ala3951fs*5      | Frameshift   | 1                                | LP                 | PVS1_Strong,PM2,                |
| TTN  | NM_003319.4 | p.Arg10046*        | Nonsense     | 4                                | LP                 | PVS1_Strong,PM2,                |
| TTN  | NM_003319.4 | p.Arg11246*        | Nonsense     | 2                                | P                  | PVS1_Strong,PM2,PS4_Supporting, |
| TTN  | NM_003319.4 | p.Arg11576*        | Nonsense     | 1                                | LP                 | PVS1_Strong,PM2,                |
| TTN  | NM_003319.4 | p.Arg12602*        | Nonsense     | 1                                | LP                 | PVS1_Strong,PM2,                |
| TTN  | NM_003319.4 | p.Arg13434*        | Nonsense     | 1                                | LP                 | PVS1_Strong,PM2,                |
| TTN  | NM_003319.4 | p.Arg14803*        | Nonsense     | 1                                | LP                 | PVS1_Strong,PM2,                |
| TTN  | NM_003319.4 | p.Arg17063Trpfs*2  | Frameshift   | 1                                | LP                 | PVS1_Strong,PM2,                |
| TTN  | NM_003319.4 | p.Arg18444*        | Nonsense     | 1                                | LP                 | PVS1_Strong,PM2,                |
| TTN  | NM_003319.4 | p.Arg18741Serfs*23 | Frameshift   | 1                                | LP                 | PVS1_Strong,PM2,                |
| TTN  | NM_003319.4 | p.Arg19299*        | Nonsense     | 1                                | LP                 | PVS1_Strong,PM2,                |
| TTN  | NM_003319.4 | p.Arg19338*        | Nonsense     | 3                                | P                  | PVS1_Strong,PM2,PS4_Supporting, |
| TTN  | NM_003319.4 | p.Arg19949*        | Nonsense     | 1                                | LP                 | PVS1_Strong,PM2,                |
| TTN  | NM_003319.4 | p.Arg2037Lysfs*56  | Frameshift   | 1                                | LP                 | PVS1_Strong,PM2,                |
| TTN  | NM_003319.4 | p.Arg21991*        | Nonsense     | 3                                | P                  | PVS1_Strong,PM2,PS4_Supporting, |
| TTN  | NM_003319.4 | p.Arg22190*        | Nonsense     | 1                                | LP                 | PVS1_Strong,PM2,                |
| TTN  | NM_003319.4 | p.Arg22605*        | Nonsense     | 1                                | LP                 | PVS1_Strong,PM2,                |
| TTN  | NM_003319.4 | p.Arg25469Asnfs*19 | Frameshift   | 1                                | LP                 | PVS1_Strong,PM2,                |
| TTN  | NM_003319.4 | p.Arg25633Glufs*48 | Frameshift   | 1                                | LP                 | PVS1_Strong,PM2,                |
| TTN  | NM_003319.4 | p.Arg4816*         | Nonsense     | 1                                | LP                 | PVS1_Strong,PM2,                |
| TTN  | NM_003319.4 | p.Arg7701*         | Nonsense     | 1                                | LP                 | PVS1_Strong,PM2,                |
| TTN  | NM_003319.4 | p.Arg9075*         | Nonsense     | 1                                | LP                 | PVS1_Strong,PM2,                |
| TTN  | NM_003319.4 | p.Asn18373Lysfs*2  | Frameshift   | 1                                | LP                 | PVS1_Strong,PM2,                |
| TTN  | NM_003319.4 | p.Asn22924Thrfs*2  | Frameshift   | 1                                | LP                 | PVS1_Strong,PM2,                |
| TTN  | NM_003319.4 | p.Asn7364Lysfs*6   | Frameshift   | 1                                | LP                 | PVS1_Strong,PM2,                |

| Gene | Transcript  | Protein change     | Variant type | Number of probands (this cohort) | ACMG Pathogenicity | ACMG rules                      |
|------|-------------|--------------------|--------------|----------------------------------|--------------------|---------------------------------|
| TTN  | NM_003319.4 | p.Asp16692Argfs*25 | Frameshift   | 1                                | LP                 | PVS1_Strong,PM2,                |
| TTN  | NM_003319.4 | p.Asp4927Phefs*7   | Frameshift   | 1                                | LP                 | PVS1_Strong,PM2,                |
| TTN  | NM_003319.4 | p.Asp5025Ilefs*2   | Frameshift   | 1                                | LP                 | PVS1_Strong,PM2,                |
| TTN  | NM_003319.4 | p.Asp7627Argfs*25  | Frameshift   | 1                                | LP                 | PVS1_Strong,PM2,                |
| TTN  | NM_003319.4 | p.Cys15379*        | Nonsense     | 1                                | LP                 | PVS1_Strong,PM2,                |
| TTN  | NM_003319.4 | p.Gln13145*        | Nonsense     | 2                                | P                  | PVS1_Strong,PM2,PS4_Supporting, |
| TTN  | NM_003319.4 | p.Gln15012Valfs*11 | Frameshift   | 1                                | LP                 | PVS1_Strong,PM2,                |
| TTN  | NM_003319.4 | p.Gln15459fs*3     | Frameshift   | 1                                | LP                 | PVS1_Strong,PM2,                |
| TTN  | NM_003319.4 | p.Gln16775*        | Nonsense     | 1                                | LP                 | PVS1_Strong,PM2,                |
| TTN  | NM_003319.4 | p.Gln20329*        | Nonsense     | 1                                | LP                 | PVS1_Strong,PM2,                |
| TTN  | NM_003319.4 | p.Gln26533*        | Nonsense     | 1                                | LP                 | PVS1_Strong,PM2,                |
| TTN  | NM_003319.4 | p.Gln3743*         | Nonsense     | 1                                | LP                 | PVS1_Strong,PM2,                |
| TTN  | NM_003319.4 | p.Glu13429*        | Nonsense     | 1                                | LP                 | PVS1_Strong,PM2,                |
| TTN  | NM_003319.4 | p.Glu18447fs*12    | Frameshift   | 1                                | LP                 | PVS1_Strong,PM2,                |
| TTN  | NM_003319.4 | p.Glu19857*        | Nonsense     | 1                                | LP                 | PVS1_Strong,PM2,                |
| TTN  | NM_003319.4 | p.Glu21059*        | Nonsense     | 1                                | LP                 | PVS1_Strong,PM2,                |
| TTN  | NM_003319.4 | p.Glu8326*         | Nonsense     | 1                                | LP                 | PVS1_Strong,PM2,                |
| TTN  | NM_003319.4 | p.Glu9990*         | Nonsense     | 1                                | LP                 | PVS1_Strong,PM2,                |
| TTN  | NM_003319.4 | p.Gly13222*        | Nonsense     | 1                                | LP                 | PVS1_Strong,PM2,                |
| TTN  | NM_003319.4 | p.Gly14825*        | Nonsense     | 1                                | LP                 | PVS1_Strong,PM2,                |
| TTN  | NM_003319.4 | p.Gly19620Trpfs*10 | Frameshift   | 1                                | LP                 | PVS1_Strong,PM2,                |
| TTN  | NM_003319.4 | p.Gly21352Valfs*44 | Frameshift   | 1                                | LP                 | PVS1_Strong,PM2,                |
| TTN  | NM_003319.4 | p.Gly7071fs*10     | Frameshift   | 1                                | P                  | PVS1_Strong,PM2,PS4_Supporting, |
| TTN  | NM_003319.4 | p.Gly7071fs*10     | Frameshift   | 1                                | P                  | PVS1_Strong,PM2,PS4_Supporting, |
| TTN  | NM_003319.4 | p.Gly8908Glufs*18  | Frameshift   | 1                                | LP                 | PVS1_Strong,PM2,                |
| TTN  | NM_003319.4 | p.Ile12461Lysfs*4  | Frameshift   | 3                                | P                  | PVS1_Strong,PM2,PS4_Supporting, |
| TTN  | NM_003319.4 | p.Ile9380Leufs*42  | Frameshift   | 4                                | P                  | PVS1_Strong,PM2,PS4_Supporting, |
| TTN  | NM_003319.4 | p.Lys11878Argfs*9  | Frameshift   | 1                                | LP                 | PVS1_Strong,PM2,                |
| TTN  | NM_003319.4 | p.Lys14986Asnfs*30 | Frameshift   | 1                                | LP                 | PVS1_Strong,PM2,                |
| TTN  | NM_003319.4 | p.Lys17360*4*      | Nonsense     | 1                                | LP                 | PVS1_Strong,PM2,                |
| TTN  | NM_003319.4 | p.Lys20040*        | Nonsense     | 1                                | LP                 | PVS1_Strong,PM2,                |
| TTN  | NM_003319.4 | p.Lys22383Asnfs*8  | Frameshift   | 1                                | LP                 | PVS1_Strong,PM2,                |
| TTN  | NM_003319.4 | p.Lys23675Argfs*16 | Frameshift   | 1                                | LP                 | PVS1_Strong,PM2,                |
| TTN  | NM_003319.4 | p.Lys24341Argfs*13 | Frameshift   | 1                                | LP                 | PVS1_Strong,PM2,                |

| Gene | Transcript  | Protein change     | Variant type | Number of probands (this cohort) | ACMG Pathogenicity | ACMG rules                      |
|------|-------------|--------------------|--------------|----------------------------------|--------------------|---------------------------------|
| TTN  | NM_003319.4 | p.Lys4004Argfs*27  | Frameshift   | 7                                | P                  | PVS1_Strong,PM2,PS4_Moderate,   |
| TTN  | NM_003319.4 | p.Met14564fs*36    | Frameshift   | 1                                | LP                 | PVS1_Strong,PM2,                |
| TTN  | NM_003319.4 | p.Phe24969Leufs*23 | Frameshift   | 1                                | LP                 | PVS1_Strong,PM2,                |
| TTN  | NM_003319.4 | p.Pro12498Leufs*10 | Frameshift   | 1                                | LP                 | PVS1_Strong,PM2,                |
| TTN  | NM_003319.4 | p.Pro13491Leufs*19 | Frameshift   | 1                                | LP                 | PVS1_Strong,PM2,                |
| TTN  | NM_003319.4 | p.Pro13683Hisfs*15 | Frameshift   | 1                                | LP                 | PVS1_Strong,PM2,                |
| TTN  | NM_003319.4 | p.Pro19096Cysfs*17 | Frameshift   | 1                                | LP                 | PVS1_Strong,PM2,                |
| TTN  | NM_003319.4 | p.Pro20196Glnfs*10 | Frameshift   | 4                                | P                  | PVS1_Strong,PM2,PS4_Supporting, |
| TTN  | NM_003319.4 | p.Ser12942Cysfs*18 | Frameshift   | 1                                | LP                 | PVS1_Strong,PM2,                |
| TTN  | NM_003319.4 | p.Ser14150Argfs*19 | Frameshift   | 1                                | LP                 | PVS1_Strong,PM2,                |
| TTN  | NM_003319.4 | p.Ser19741Valfs*   | Frameshift   | 1                                | LP                 | PVS1_Strong,PM2,                |
| TTN  | NM_003319.4 | p.Ser20089Lysfs*3  | Frameshift   | 1                                | LP                 | PVS1_Strong,PM2,                |
| TTN  | NM_003319.4 | p.Ser21018Argfs*29 | Frameshift   | 1                                | LP                 | PVS1_Strong,PM2,                |
| TTN  | NM_003319.4 | p.Ser3833*         | Nonsense     | 1                                | LP                 | PVS1_Strong,PM2,                |
| TTN  | NM_003319.4 | p.Ser6648Leufs*2   | Frameshift   | 4                                | P                  | PVS1_Strong,PM2,PS4_Supporting, |
| TTN  | NM_003319.4 | p.Ser9193Valfs*34  | Frameshift   | 2                                | P                  | PVS1_Strong,PM2,PS4_Supporting, |
| TTN  | NM_003319.4 | p.Thr23412Asnfs*13 | Frameshift   | 2                                | P                  | PVS1_Strong,PM2,PS4_Supporting, |
| TTN  | NM_003319.4 | p.Thr3797Profs*8   | Frameshift   | 1                                | LP                 | PVS1_Strong,PM2,                |
| TTN  | NM_003319.4 | p.Trp14196*        | Nonsense     | 1                                | LP                 | PVS1_Strong,PM2,                |
| TTN  | NM_003319.4 | p.Thr14749Asnfs*13 | Frameshift   | 1                                | LP                 | PVS1_Strong,PM2,                |
| TTN  | NM_003319.4 | p.Trp21894*        | Nonsense     | 3                                | P                  | PVS1_Strong,PM2,PS4_Supporting, |
| TTN  | NM_003319.4 | p.Trp25105*        | Nonsense     | 1                                | LP                 | PVS1_Strong,PM2,                |
| TTN  | NM_003319.4 | p.Trp5998*         | Nonsense     | 1                                | LP                 | PVS1_Strong,PM2,                |
| TTN  | NM_003319.4 | p.Tyr13061*        | Nonsense     | 1                                | LP                 | PVS1_Strong,PM2,                |
| TTN  | NM_003319.4 | p.Tyr16702Leufs*4  | Frameshift   | 2                                | P                  | PVS1_Strong,PM2,PS4_Supporting, |
| TTN  | NM_003319.4 | p.Tyr22496*        | Nonsense     | 1                                | LP                 | PVS1_Strong,PM2,                |
| TTN  | NM_003319.4 | p.Val17902Tyrfs*16 | Frameshift   | 3                                | P                  | PVS1_Strong,PM2,PS4_Supporting, |
| TTN  | NM_003319.4 | p.Val21702*        | Nonsense     | 1                                | LP                 | PVS1_Strong,PM2,                |
| TTN  | NM_003319.4 | p.Val22025Glnfs*5  | Frameshift   | 1                                | LP                 | PVS1_Strong,PM2,                |
| TTN  | NM_003319.4 | p.Val22853Glnfs*10 | Frameshift   | 1                                | LP                 | PVS1_Strong,PM2,                |
| TTN  | NM_003319.4 | p.Val7540Phefs*24  | Frameshift   | 1                                | LP                 | PVS1_Strong,PM2,                |
| TTN  | NM_003319.4 | p.Met6522Asnfs*4   | Frameshift   | 1                                | LP                 | PVS1_Strong,PM2,                |
